# Supplementary material for: A calixarene-based copper-centered redox switch as a data storage prototype
Source: Royal Society of Chemistry journal article supplement (doi:10.1039/b907207a), 2009-01-01

## **Supporting Information for**

### ***Remarkably Bistable and Fast Reversible Calixarene Based Copper Centered Redox Molecular Switch***

Ulrich Darbost,\* Vanessa Penin, Erwann Jeanneau, Caroline Félix, Francis Vocanson, Christophe Bucher, Guy Royal and Isabelle Bonnamour

**E-mail : [ulrich.darbost@univ-lyon1.fr](mailto:ulrich.darbost@univ-lyon1.fr)**

#### **Outline:**

**Synthesis, analysis and electrochemistry general methods**

**Synthetic procedures**

**Crystallographic data**

**Figure S1:**  $^1\text{H}$  NMR Spectrum of compound **2**

**Figure S2:**  $^{13}\text{C}$  NMR Spectrum of compound **2**

**Figure S3:**  $^{13}\text{C}$ -DEPT NMR Spectrum of compound **2**

**Figure S4:** COSY NMR Spectrum of compound **2**

**Figure S5:** HSQC Spectrum of compound **2**

**Figure S6:** Mass Spectrum of compound **2**

**Figure S7:** IR Spectrum of compound **2**

**Figure S8:**  $^1\text{H}$  NMR Spectrum of compound **3**

**Figure S9:**  $^{13}\text{C}$  NMR Spectrum of compound **3**

**Figure S10:**  $^{13}\text{C}$ -DEPT NMR Spectrum of compound **3**

**Figure S11:** COSY NMR Spectrum of compound **3**

**Figure S12:** HSQC Spectrum of compound **3**

**Figure S13:** Mass Spectrum of compound **3**

**Figure S14:** IR Spectrum of compound **3**

**Figure S15:**  $^1\text{H}$  NMR Spectrum of compound **3.CuI**

**Figure S16:**  $^{13}\text{C}$  NMR Spectrum of compound **3.CuI**

**Figure S17:** Mass Spectrum of compound **3.CuI**

**Figure S18:** IR Spectrum of compound **3.CuI**

**Figure S19:** UV-vis Spectrum of compound **3.CuI**

**Figure S20:** EPR Spectrum of compound **3.CuII**

**Figure S21:** Mass Spectrum of compound **3.CuII**

**Figure S22:** IR Spectrum of compound **3.CuII**

**Figure S23:** UV-vis Spectrum of compound **3.CuII**

**Figure S24:** Dual display of  $^1\text{H}$  NMR spectra of compounds **3** and **3.CuI**

**Figure S25-S35:** Electrochemical experiments realized on compounds **3.CuI** and **3.CuII**

---

**General methods.** Solvents were purified and dried by standard methods prior to use. All reactions were carried out under nitrogen. Column chromatography was performed using silica gel (Kieselgel-60, 0.040-0.063 nm, Merck). Reactions were monitored by TLC on POLYGAM<sup>®</sup> SIL G/UV<sub>254</sub> (Macherey-Nagel) silica gel plate and visualized by UV light.  $^1\text{H}$  NMR and  $^{13}\text{C}$  NMR spectra were recorded at 300 and 75 MHz ( $\text{CDCl}_3$ ) on a Bruker Avance DRX 300 spectrometer. Mass spectra were acquired on a ThermoFinnigan LCQ Advantage ion trap instrument, detecting positive ions (+) or negative ions (-) in the ESI mode. Samples (in methanol:dichloromethane:water, 45:40:15, v/v/v) were infused directly into the source (5  $\mu\text{L}/\text{min}$ ) using a syringe pump. The following source parameters were applied: spray voltage 3.0–3.5 kV, nitrogen sheath gas flow 5–20 arbitrary units. The heated capillary was held at 200°C. High resolution mass spectra were acquired on a THERMOQUEST Finnigan MAT 95 XL. Acetonitrile (Rathburn, HPLC grade) was used as received. Tetra-*n*-butylammonium  $\text{PF}_6$  was purchased from Fluka and used as received. Electrochemical experiments were conducted in a conventional three-electrode cell. For analytical experiments, the counter electrode was a platinum wire. The reference electrode was a  $\text{Ag}/\text{AgNO}_3$  (10 mM in  $\text{CH}_3\text{CN}$  containing 0.1 M TBAP) purchased from CH-instrument. Rotating disk electrode (RDE) voltammetry was carried out with a radiometer equipment at a rotation rate of 500 rpm using glassy carbon RDE tips ( $\text{Ø} = 2$  mm). Cyclic voltammetry (CV) curves were recorded using a CH instrument CH-660 potentiostat. The CH-instrument vitreous carbon working electrodes ( $\text{Ø} = 2$  mm). were polished with 1  $\mu\text{m}$  diamond paste before each recording. Electrolyses were performed at controlled

potential using a Pt plate as working electrode as well as a large Pt counter electrode isolated through an ionic bridge.

### Synthesis of Di-quinoline calixarene 2

Under nitrogen atmosphere, dibromo calixarene **1** (4.25 g ; 4.62 mmol ; 1 equiv) and  $K_2CO_3$  (2.55 g ; 18.5 mmol ; 4 equiv) were dissolved in freshly distillate acetonitrile (80 mL). The suspension was stirring during 30 minutes at room temperature. 8-hydroxyquinoline (5,36 g ; 37,0 mmol ; 8 éq.) was then added and the reaction mixture was refluxing during 5 days. After allowing the mixture going back to room temperature, the solvent was removed under reduced pressure and the resulting residue was dissolved in dichloromethane and wash with HCl 10 % (100 mL), then with water until pH = 7. After dichloromethane extraction, drying, filtration and solvent evaporation, the resulting crude compound was purified by flash chromatography (methanol/dichloromethane 3/97) giving pure diquinoleine calixarene **2** (3.09 g, 64 %) as pale beige solid: mp 190 °C dec; IR ( $CHCl_3$ )  $\nu$  3403, 2952, 1485, 1318, 1111, 745  $cm^{-1}$ ;  $^1H$  NMR ( $CDCl_3$ )  $\delta$  0.89 (s, 18 H, tBu), 1.22 (s, 18H, tBu), 2.17-2.22 (m, 4H, O- $CH_2$ - $CH_2$ - $CH_2$ - $CH_2$ -O-quinol), 2.28-2.34 (m, 4H, O- $CH_2$ - $CH_2$ - $CH_2$ - $CH_2$ -O-quinol), 3.24 (d, 4H,  $J$  = 13 Hz, Ar- $CH_2$ -Ar ax), 4.00 (t, 4H,  $J$  = 6.2 Hz, O- $CH_2$ - $CH_2$ - $CH_2$ - $CH_2$ -O-quinol), 4.20 (d, 4H,  $J$  = 13 Hz, Ar- $CH_2$ -Ar eq), 4.31 (t, 4H,  $J$  = 5.9 Hz, O- $CH_2$ - $CH_2$ - $CH_2$ - $CH_2$ -O-quinol), 6.73 (s, 4H,  $ArH_{calix}$ ), 6.98 (s, 4H,  $ArH_{calix}$ ), 7.06 (sl, 2H,  $H_{quinoline}$ ), 7.29-7.38 (m, 6H,  $H_{quinoline}$ ), 7.49 (s, 2H, OH) ; 8.10 (d, 2H,  $J$  = 7 Hz,  $H_{quinoline}$ ), 8.91 (m, 2H,  $H_{quinoline}$ );  $^{13}C$  NMR ( $CDCl_3$ )  $\delta$  26.2, 27.3, 31.4, 32.1, 34.2, 34.3, 68.9, 76.5, 109.4, 119.8, 121.8, 125.5, 125.9, 127.2, 128.2, 129.9, 133.0, 136.2, 140.8, 141.8, 147.2, 149.6, 150.3, 151.1, 155.2. HRMS (ESI-TOF)  $m/z$  : calcd for  $C_{70}H_{83}N_2O_6$  [ $M + H$ ] $^+$ : 1047.6251; Found: 1047.6244.

---

### Synthesis of [di-quinol di-imidazole] calixarene 3

Under nitrogen atmosphere, anhydrous THF was added to a mixture of di-quinoline calixarene **2** (2.00 g; 1.91 mmol) and NaH (60% in oil, 1.38 g, 34.5 mmol). The reaction mixture was stirred for one hour at room temperature and 2-chloromethyl-*N*-methylimidazole hydrochloride (1.92 g, 11.5 mmol) was introduced. After 18 h of refluxing, the solvent was removed under reduced pressure and the resulting residue was dissolved in dichloromethane and washed with water until pH = 7. After dichloromethane extraction drying, filtration and solvent evaporation, the resulting crude compound was purified by flash chromatography (dichlorométhane/méthanol/triéthylamine : 88/10/2) giving pure di-imidazole di-quinoline calixarene **3** (1.13 g, 48 %) as a white solid: mp 194 °C ; IR ( $CHCl_3$ )  $\nu$  2959, 1479, 1260, 1105, 791  $cm^{-1}$ ;  $^1H$  NMR ( $CDCl_3$ )  $\delta$  0.79 (s, 18 H, tBu), 1.22 (s, 18H, tBu), 1.79-1.90 (m, 4H, O- $CH_2$ -

CH<sub>2</sub>-CH<sub>2</sub>-CH<sub>2</sub>-O-quino), 1.95-2.05 (m, 4H, O-CH<sub>2</sub>-CH<sub>2</sub>-CH<sub>2</sub>-CH<sub>2</sub>-O-quino), 2.99 (d, 4H, *J* = 13 Hz, Ar-CH<sub>2</sub>-Ar ax), 3.46 (s, 6H, NCH<sub>3</sub>), 3.90 (t, 4H, *J* = 5.9 Hz, O-CH<sub>2</sub>-CH<sub>2</sub>-CH<sub>2</sub>-CH<sub>2</sub>-O-quino), 4.09 (t, 4H, *J* = 6.2 Hz, O-CH<sub>2</sub>-CH<sub>2</sub>-CH<sub>2</sub>-CH<sub>2</sub>-O-quino), 4.30 (d, 4H, *J* = 13 Hz, Ar-CH<sub>2</sub>-Ar eq), 4.78 (s, 4H, CH<sub>2</sub>Im), 6.44 (s, 4H, Ar*H*<sub>calix</sub>), 6.70 (s, 2H, Im*H*), 6.88 (s, 2H, Im*H*), 6.97 (s, 4H, Ar*H*<sub>calix</sub>), 7.02 (d, 2H, *J* = 7.0 Hz, *H*<sub>quinoline</sub>), 7.20-7.34 (m, 6H, *H*<sub>quinoline</sub>), 8.03 (d, 2H, *J* = 7 Hz, *H*<sub>quinoline</sub>), 8.83-8.84 (m, 2H, *H*<sub>quinoline</sub>); <sup>13</sup>C NMR (CDCl<sub>3</sub>) δ 26.2, 26.8, 31.3, 31.6, 32.1, 33.2, 34.1, 34.4, 67.7, 69.5, 75.0, 109.4, 119.7, 121.9, 125.1, 125.8, 125.8, 128.5, 129.9, 132.9, 135.5, 136.2, 140.8, 145.1, 145.3, 149.5, 151.8, 154.7, 155.3. HRMS (ESI-TOF) *m/z* : calcd for C<sub>80</sub>H<sub>95</sub>N<sub>6</sub>O<sub>6</sub> [*M* + H]<sup>+</sup>: 1235.7313; Found: 1235.7313.

### Synthesis of complex 3.Cu I

Under nitrogen, CHCl<sub>3</sub> (3 mL) was added to a mixture of di-quino di-midazole calixarene **3** (30.0 mg, 0.024 mmol) and [Cu(CH<sub>3</sub>CN)<sub>4</sub>]PF<sub>6</sub> (9.5 mg, 0.025 mmol). The resulting pale yellow solution was stirring for one hour at room temperature. After a removal of the solvent under reduces pressure, the obtained complex **3.Cu I** was dry under vacuum. (31 mg, 88 %): mp 155 °C dec; IR (CHCl<sub>3</sub>) ν 2953, 1571, 1502, 1479, 837 cm<sup>-1</sup>; <sup>1</sup>H NMR (CDCl<sub>3</sub>) δ 0.81 (s, 18 H, tBu), 1.37 (s, 18H, tBu), 1.90-2.20 (m, 8H, O-CH<sub>2</sub>-CH<sub>2</sub>-CH<sub>2</sub>-CH<sub>2</sub>-O-quino), 3.02 (s, 6H, NCH<sub>3</sub>), 3.11 (d, 4H, *J* = 13 Hz, Ar-CH<sub>2</sub>-Ar ax), 3.70-3.80 (m, 4H, O-CH<sub>2</sub>-CH<sub>2</sub>-CH<sub>2</sub>-CH<sub>2</sub>-O-quino), 3.95 (d, 4H, *J* = 13 Hz, Ar-CH<sub>2</sub>-Ar eq), 4.30-4.40 (m, 4H, O-CH<sub>2</sub>-CH<sub>2</sub>-CH<sub>2</sub>-CH<sub>2</sub>-O-quino), 5.45-5.55 (m, 4H, CH<sub>2</sub>Im), 6.36 (s, 4H, Ar*H*<sub>calix</sub>), 6.80-7.00 (m, 4H, Im*H*), 7.14 (s, 4H, Ar*H*<sub>calix</sub>), 7.18 (d, 2H, *J* = 8.4 Hz, *H*<sub>quinoline</sub>), 7.30-7.55 (m, 6H, *H*<sub>quinoline</sub>), 8.12 (d, 2H, *J* = 8.1 Hz, *H*<sub>quinoline</sub>), 8.80 (d, 2H, *J* = 4.6 Hz, *H*<sub>quinoline</sub>); <sup>13</sup>C NMR (CDCl<sub>3</sub>) δ 26.5, 27.8, 31.5, 31.7, 32.1, 34.0, 34.6, 71.0, 109.7, 120.1, 122.2, 124.9, 126.7, 127.6, 130.0, 131.6, 135.9, 136.6, 140.1, 145.0, 147.2, 149.7, 150.4, 153.8, 154.8. HRMS (ESI-TOF) *m/z*: calcd for C<sub>80</sub>H<sub>94</sub>CuN<sub>6</sub>O<sub>6</sub> [*M*]<sup>+</sup>: 1297.6531; Found: 1297.6528.

---

### Synthesis of complex 3.Cu II

Under nitrogen, CH<sub>3</sub>CN (3 mL) was added to a mixture of di-quino di-midazole calixarene **3** (32.1 mg, 0.026 mmol) and Cu(ClO<sub>4</sub>)<sub>2</sub>·6H<sub>2</sub>O (9.8 mg, 0.026 mmol). The resulting deep green solution was stirring for one hour at room temperature. After a removal of the solvent under reduces pressure, the obtained complex **3.Cu II** was dry under vacuum. (32 mg, 82 %): mp 190 °C dec; IR (CHCl<sub>3</sub>) ν 2954, 1585, 1509, 1479, 1083 cm<sup>-1</sup>; HRMS (ESI-TOF) *m/z*: calcd for C<sub>80</sub>H<sub>94</sub>ClCuN<sub>6</sub>O<sub>10</sub> [*M*-ClO<sub>4</sub>]<sup>+</sup>: 1396.6016; Found: 1396.6018; UV-vis (λ<sub>max</sub> = 635 nm, ε = 62.4 M<sup>-1</sup>.cm<sup>-1</sup>). EPR: (9.44 GHz, 40K, CH<sub>3</sub>CN/Toluene 1/1, v/v): A<sub>||</sub> = 172 10<sup>-4</sup> cm<sup>-1</sup> g<sub>||</sub> = 2.211 g<sub>⊥</sub> = 2.004.

---

## Crystallographic data

A suitable crystal was mounted on a Nonius KappaCCD diffractometer using Mo K $\alpha$  radiation ( $\lambda = 0.71073 \text{ \AA}$ ). Intensities were collected at 150(1) K for CCDC 727116 and 293(2) K for CCDC 727115 by means of the COLLECT software.[1] Reflection indexing, Lorentz-polarization correction, peak integration, and background determination were carried out with DENZO.[2] Frame scaling and unit-cell parameters refinement were made with SCALEPACK.[2] A semi-empirical absorption correction was applied using the program DIFABS [3]. The structures were solved by direct methods with SIR97.[4] The remaining non-hydrogen atoms were located by successive difference Fourier map analyses. H-atoms were placed geometrically and included in the refinement using soft restraints on the bond lengths and angles to regularize their geometry (C-H in the range 0.93-0.98  $\text{\AA}$  and O-H = 0.82  $\text{\AA}$ ) and isotropic atomic displacement parameters ( $U(\text{H})$  in the range 1.2-1.5 times  $U_{\text{eq}}$  of the adjacent atom). In the last cycles of the refinement, the hydrogen atoms were refined using a riding mode. The structure refinement was carried out with CRYSTALS.[5]

[1] Nonius, B. V. *COLLECT*; Nonius: Delft, The Netherlands, 1997-2001.

[2] Otwinowski, Z.; Minor, W. *Methods in Enzymology*; Carter, C. W., Jr., Sweet, R. M., Eds.; Academic Press: New York, 1997; Vol. 276, pp 307-326.

[3] Walker N. and Stuart D., *Acta Crystallogr.*, Sect A **1983**, 39, 158-166.

[4] Altomare, A.; Burla, M. C.; Camalli, M.; Cascarano, G. L.; Giacovazzo, C.; Guagliardi, A.; Moliterni, A. G. G.; Polidori, G.; Spagna, R. *J. Appl. Crystallogr.* **1999**, 32, 115-119.

[5] Betteridge, P. W.; Carruthers, J. R.; Cooper, R. I.; Prout, K. and Watkin, D. J. *J. Appl. Crystallogr.* **2003**, 36, 1487.

**Table S1.** Selected Crystal data for [3.Cu(II)H<sub>2</sub>O](ClO<sub>4</sub>)<sub>2</sub>

|                                 |                                                                                                                                                             |                           |
|---------------------------------|-------------------------------------------------------------------------------------------------------------------------------------------------------------|---------------------------|
| Empirical formula               | C <sub>80</sub> H <sub>96</sub> CuN <sub>6</sub> O <sub>7</sub> ·C <sub>4</sub> H <sub>10</sub> O·0.5(C <sub>2</sub> H <sub>3</sub> N)·2(ClO <sub>4</sub> ) |                           |
| Formula weight                  | 1795.51 g/mol                                                                                                                                               |                           |
| Temperature                     | 150(2) K                                                                                                                                                    |                           |
| Wavelength                      | 0.71073 Å                                                                                                                                                   |                           |
| Crystal system                  | Triclinic                                                                                                                                                   |                           |
| Space group                     | <i>P</i> -1                                                                                                                                                 |                           |
| Unit cell dimensions            | <i>a</i> = 11.4073(2) Å                                                                                                                                     | $\alpha$ = 90.6330(10) °. |
|                                 | <i>b</i> = 15.2526(3) Å                                                                                                                                     | $\beta$ = 93.9510(10) °.  |
|                                 | <i>c</i> = 29.7017(8) Å                                                                                                                                     | $\gamma$ = 112.043(2) °.  |
| Volume                          | 4774.88(19) Å <sup>3</sup>                                                                                                                                  |                           |
| <i>Z</i>                        | 2                                                                                                                                                           |                           |
| Density (calculated)            | 1.249 Mg/m <sup>3</sup>                                                                                                                                     |                           |
| Absorption coefficient          | 0.35 mm <sup>-1</sup>                                                                                                                                       |                           |
| <i>F</i> (000)                  | 1906                                                                                                                                                        |                           |
| Crystal size                    | 0.07000 x 0.1100 x 0.1200 mm <sup>3</sup>                                                                                                                   |                           |
| Theta range for data collection | 0.7 to 28.6 °.                                                                                                                                              |                           |
| Index ranges                    | 0 ≤ <i>h</i> ≤ 15, -20 ≤ <i>k</i> ≤ 18, -40 ≤ <i>l</i> ≤ 39                                                                                                 |                           |
| reflections                     | 12327 with <i>I</i> > 2.0σ( <i>I</i> ),                                                                                                                     |                           |

**Table S2.** Selected Crystal data for [3.Cu(I)]PF<sub>6</sub>

|                                 |                                                                                   |                 |
|---------------------------------|-----------------------------------------------------------------------------------|-----------------|
| Empirical formula               | C <sub>80</sub> H <sub>93</sub> CuN <sub>6</sub> O <sub>6</sub> ·F <sub>6</sub> P |                 |
| Formula weight                  | 1443.13 g/mol                                                                     |                 |
| Temperature                     | 293 K                                                                             |                 |
| Wavelength                      | 0.71069 Å                                                                         |                 |
| Crystal system                  | Monoclinic                                                                        |                 |
| Space group                     | P 2 <sub>1</sub>                                                                  |                 |
| Unit cell dimensions            | a = 14.399(5) Å                                                                   | α = 90 °.       |
|                                 | b = 32.127(6) Å                                                                   | β = 110.3(1) °. |
|                                 | c = 19.851(9) Å                                                                   | γ = 90 °.       |
| Volume                          | 8614(5) Å <sup>3</sup>                                                            |                 |
| Z                               | 4                                                                                 |                 |
| Density (calculated)            | 1.113 Mg/m <sup>3</sup>                                                           |                 |
| Absorption coefficient          | 0.330 mm <sup>-1</sup>                                                            |                 |
| F(000)                          | 3044                                                                              |                 |
| Crystal size                    | 0.04 x 0.05 x 0.12 mm <sup>3</sup>                                                |                 |
| Theta range for data collection | 1.1 to 22.5 °.                                                                    |                 |
| Index ranges                    | -15 ≤ h ≤ 14, 0 ≤ k ≤ 34, 0 ≤ l ≤ 21                                              |                 |
| reflections                     | 6483 with I > 2.0σ(I),                                                            |                 |

**Figure S1:**  $^1\text{H}$  NMR Spectrum of compound **2**

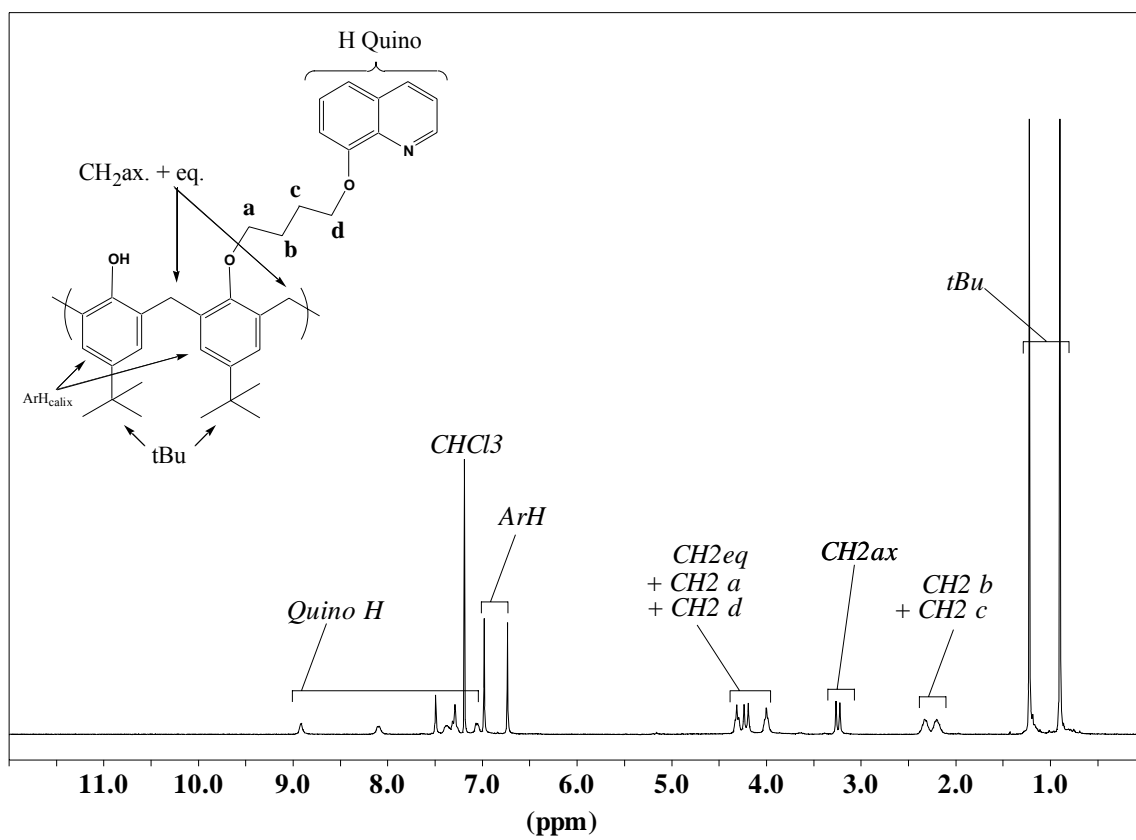



**Figure S2:**  $^{13}\text{C}$  NMR Spectrum of compound **2**

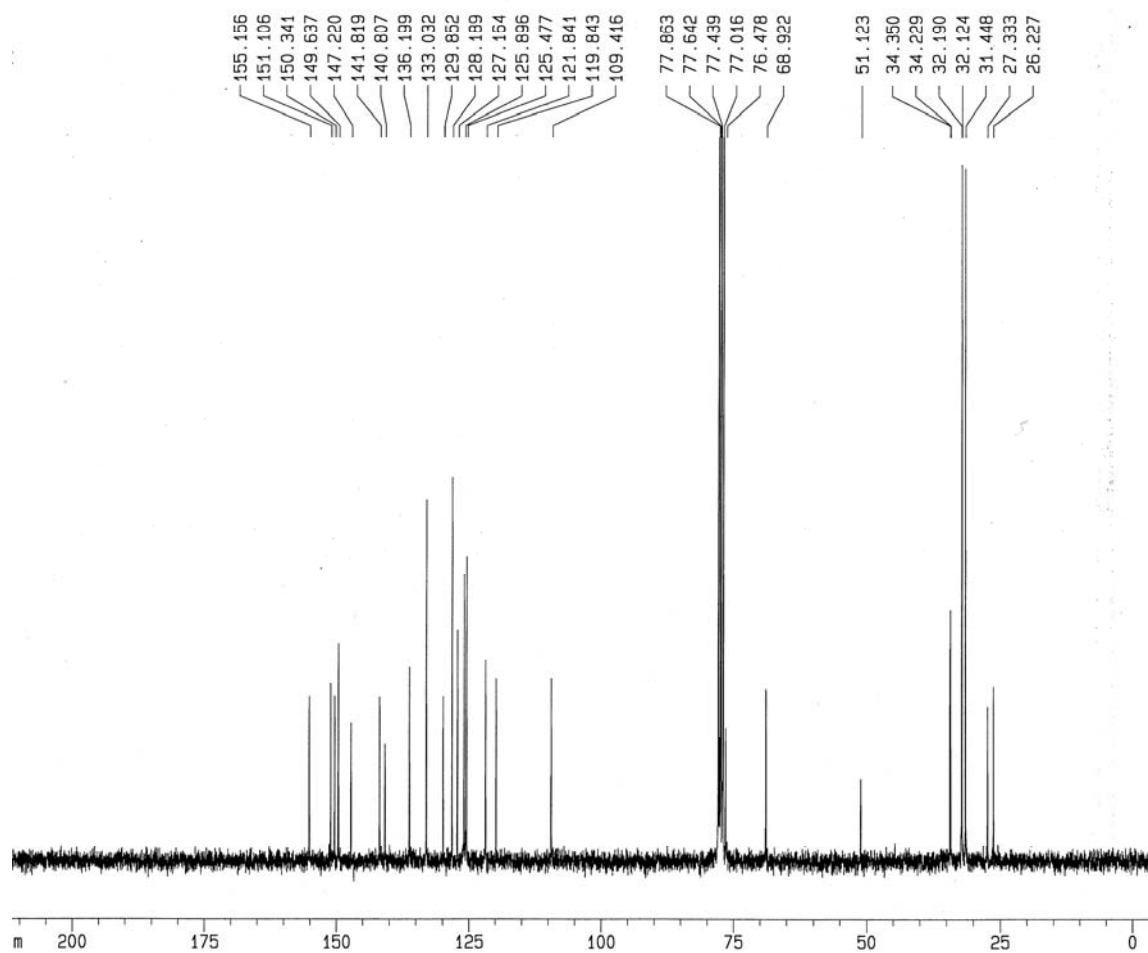

**Figure S3:**  $^{13}\text{C}$ -DEPT NMR Spectrum of compound **2**

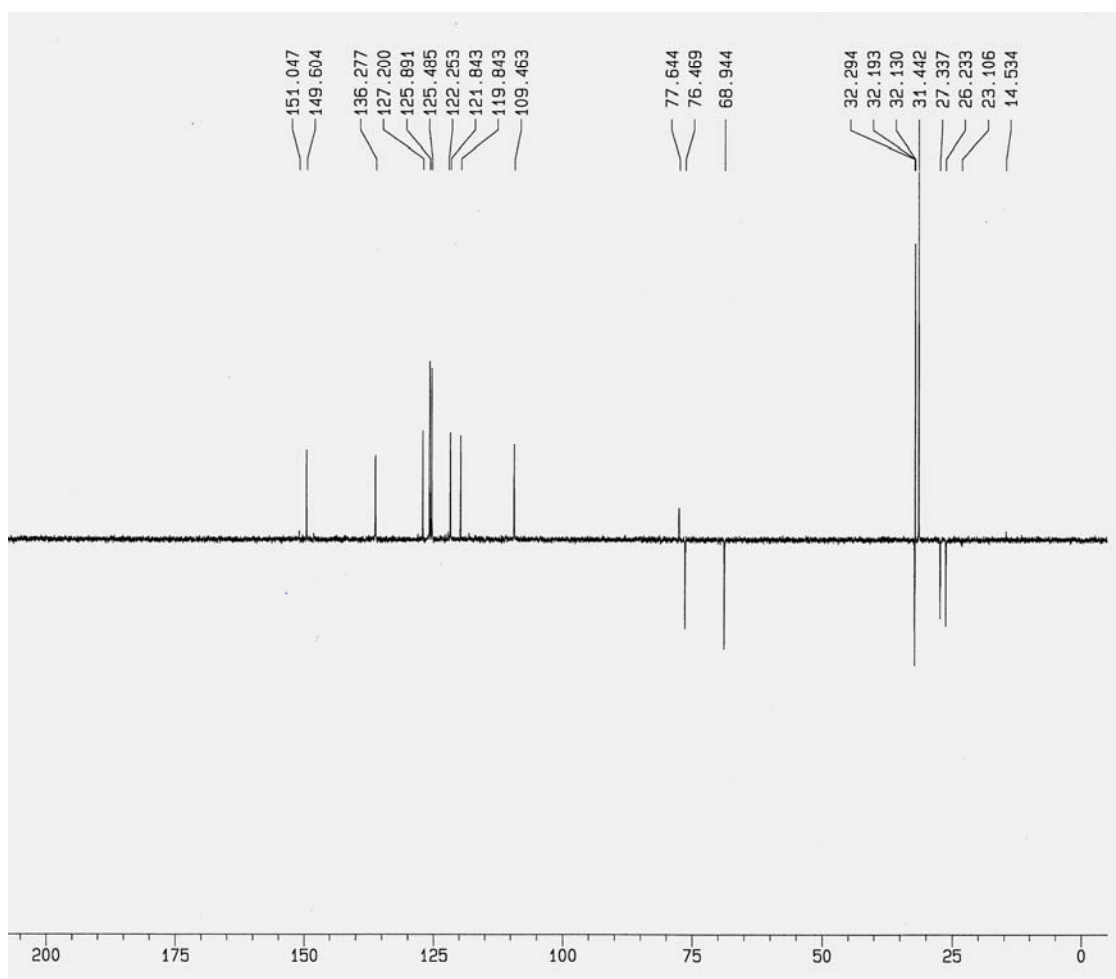

**Figure S4:** COSY-2D NMR Spectrum of compound 2

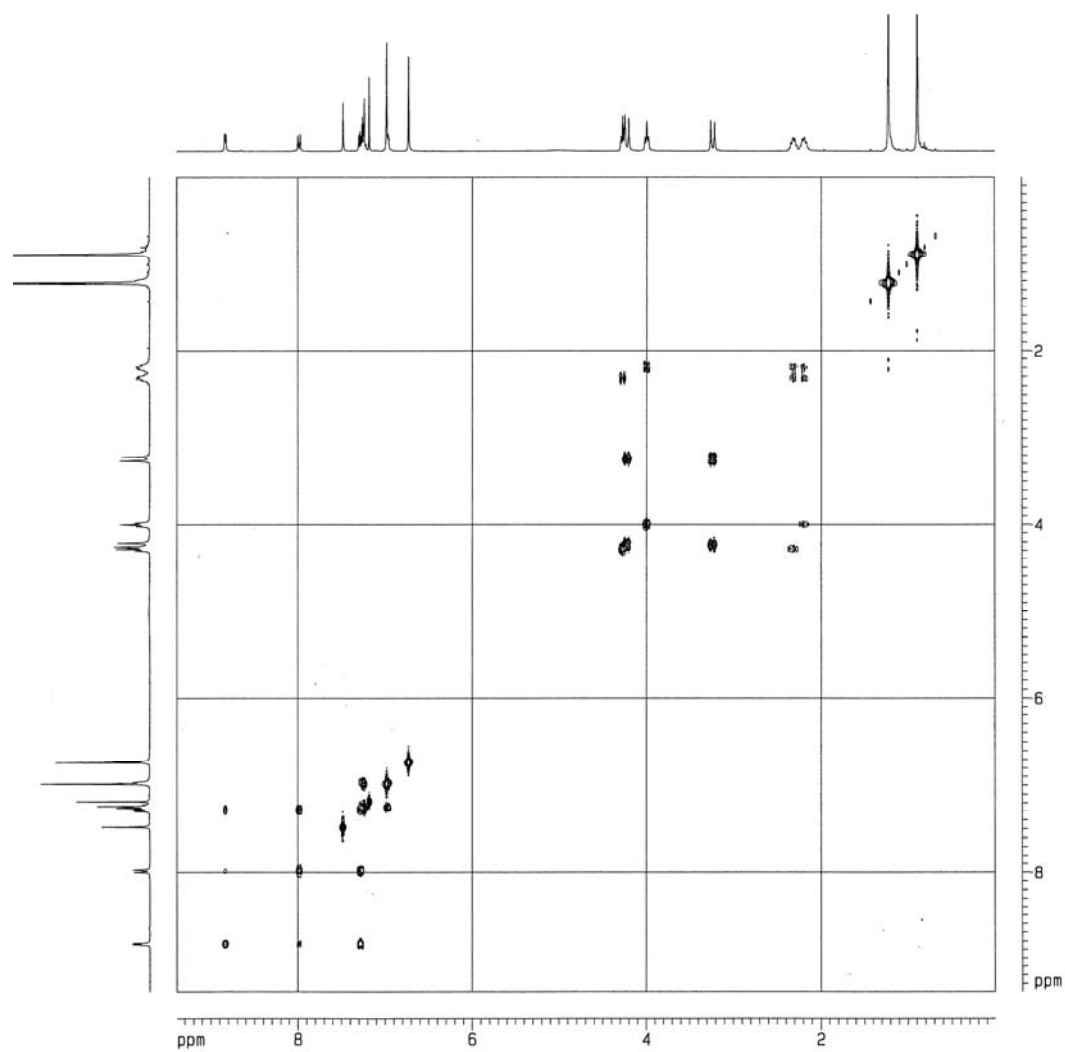

**Figure S5:** HSQC Spectrum of compound 2

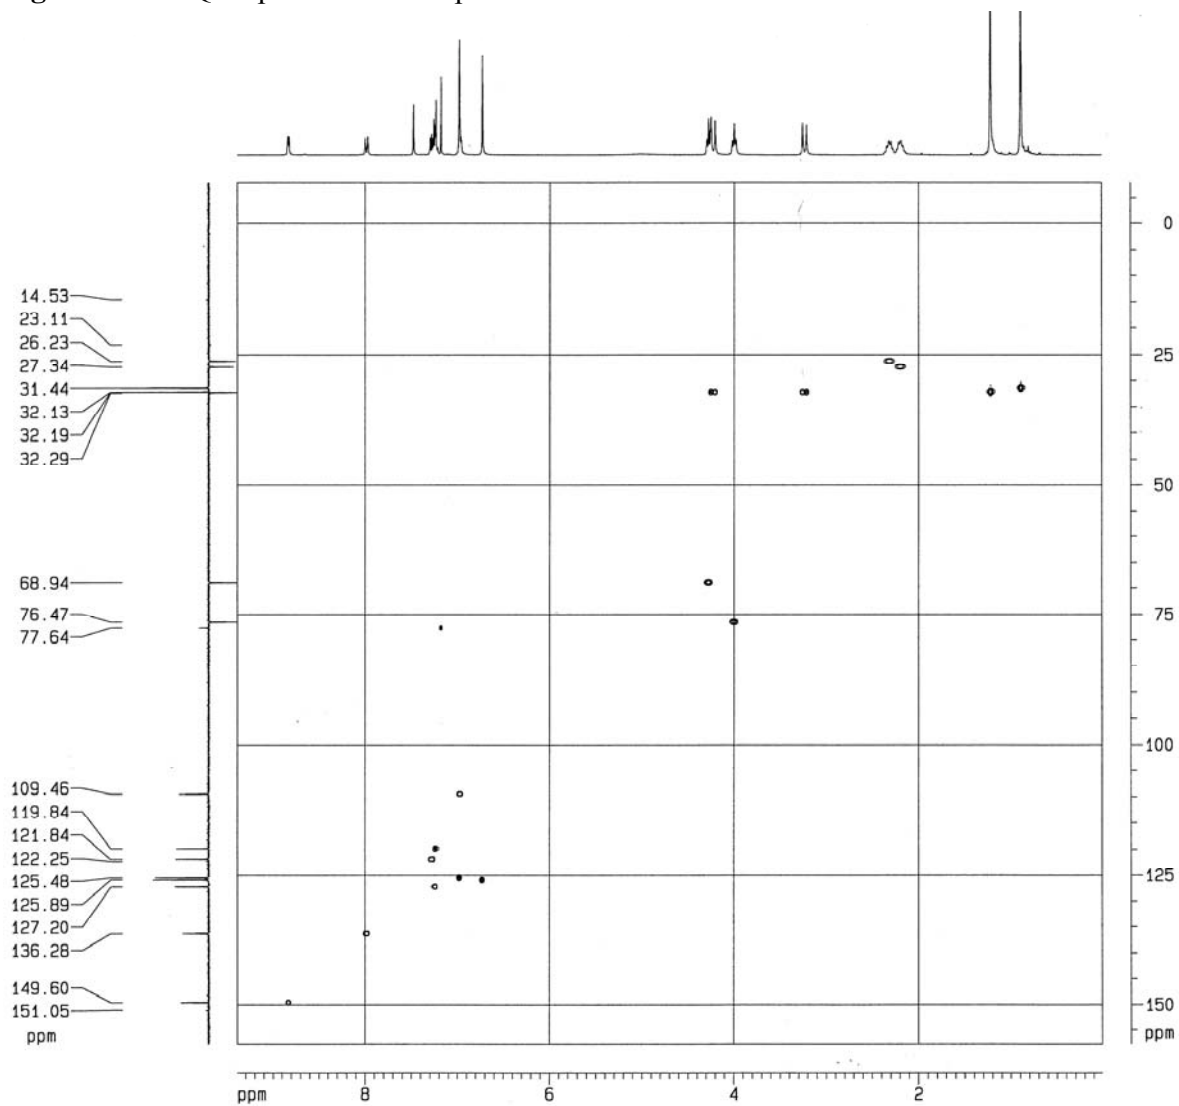

**Figure S6:** Mass Spectrum of compound 2

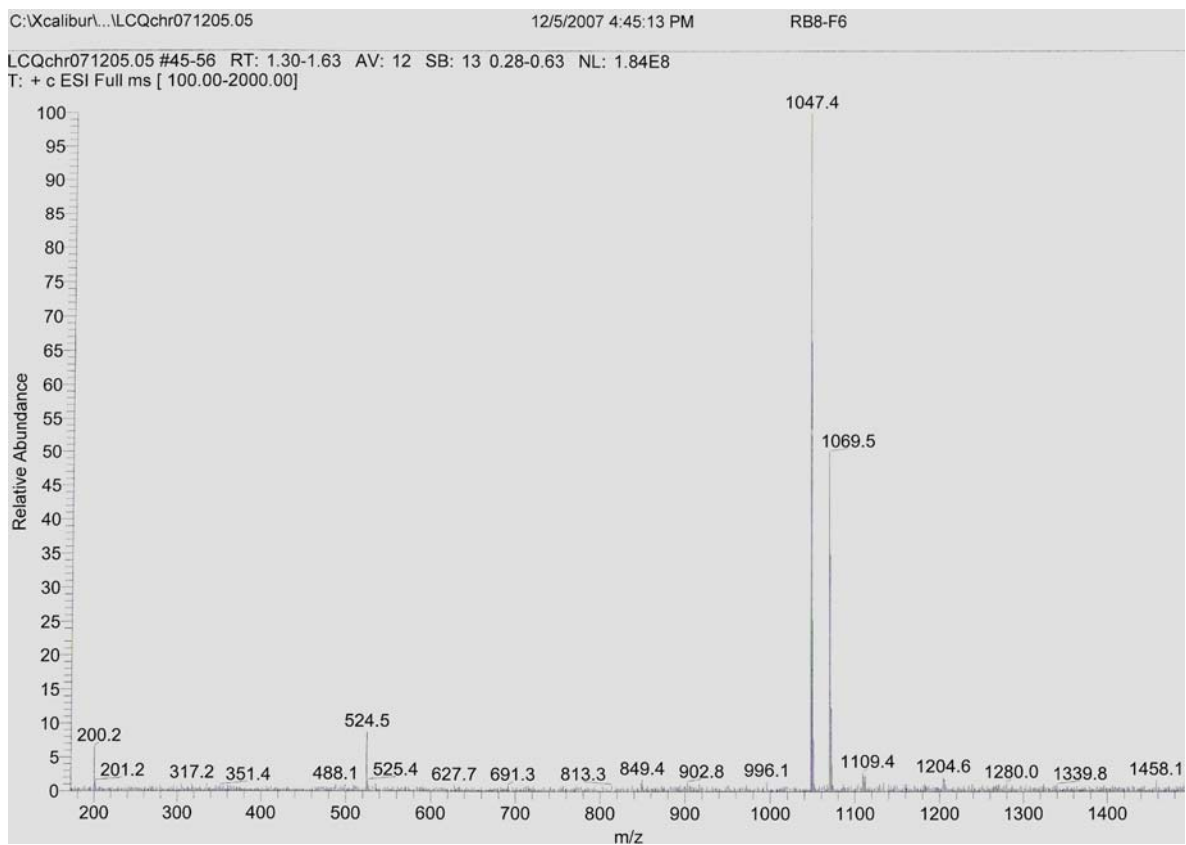

**Figure S7:** IR Spectrum of compound 2

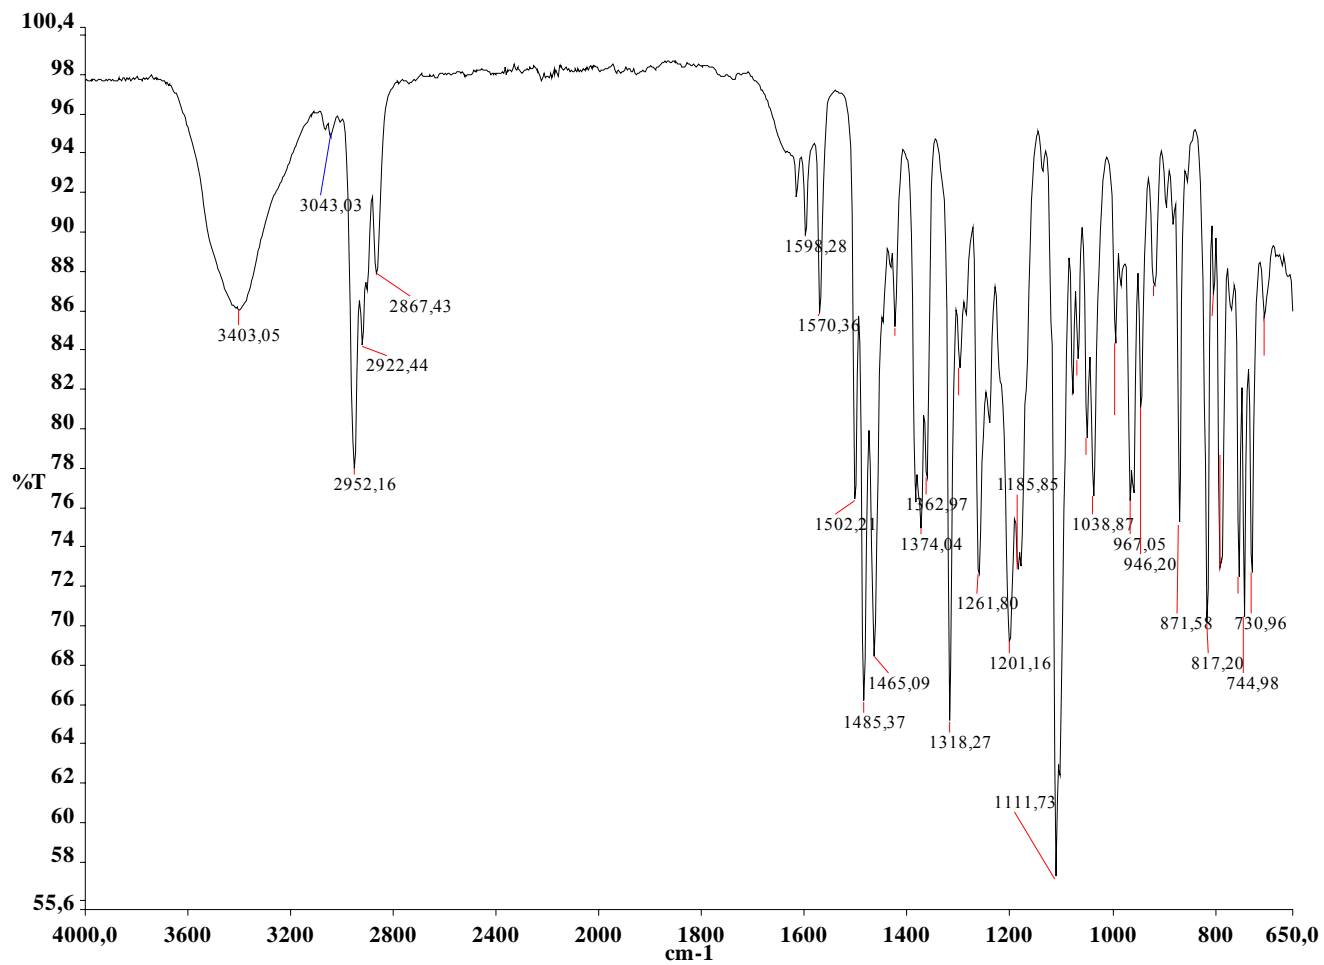

**Figure S8:**  $^1\text{H}$  NMR Spectrum of compound **3**

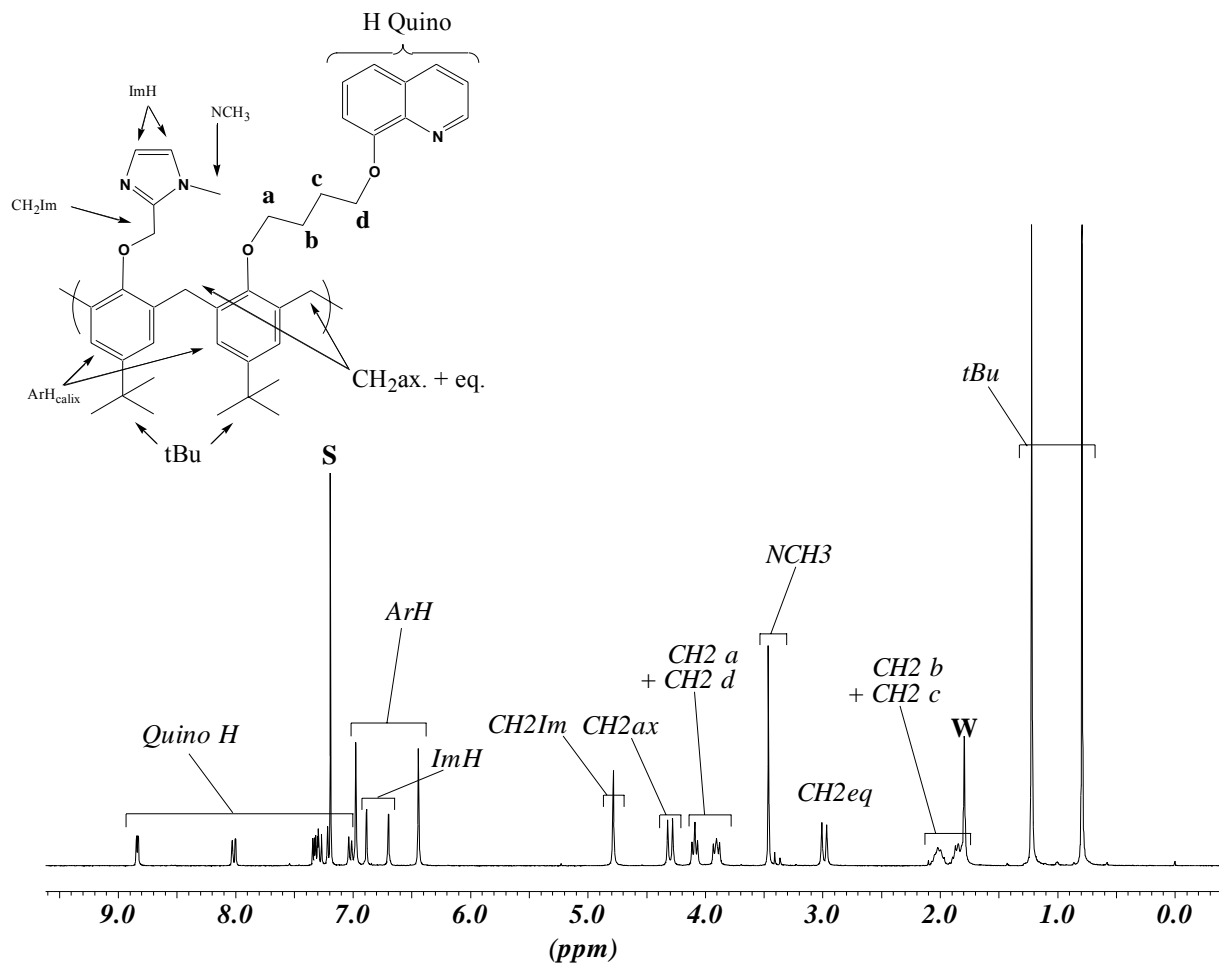

**Figure S9:**  $^{13}\text{C}$  NMR Spectrum of compound **3**

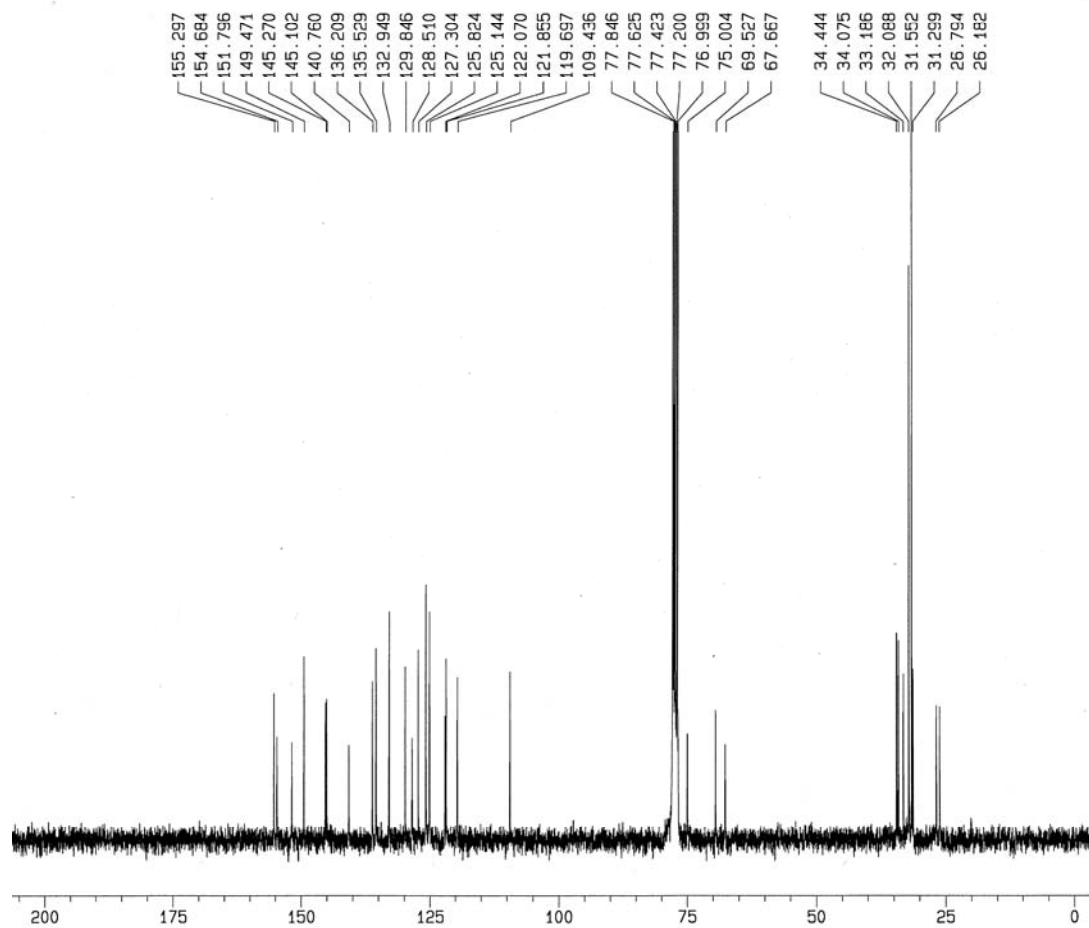



**Figure S10:**  $^{13}\text{C}$ -DEPT NMR Spectrum of compound **3**

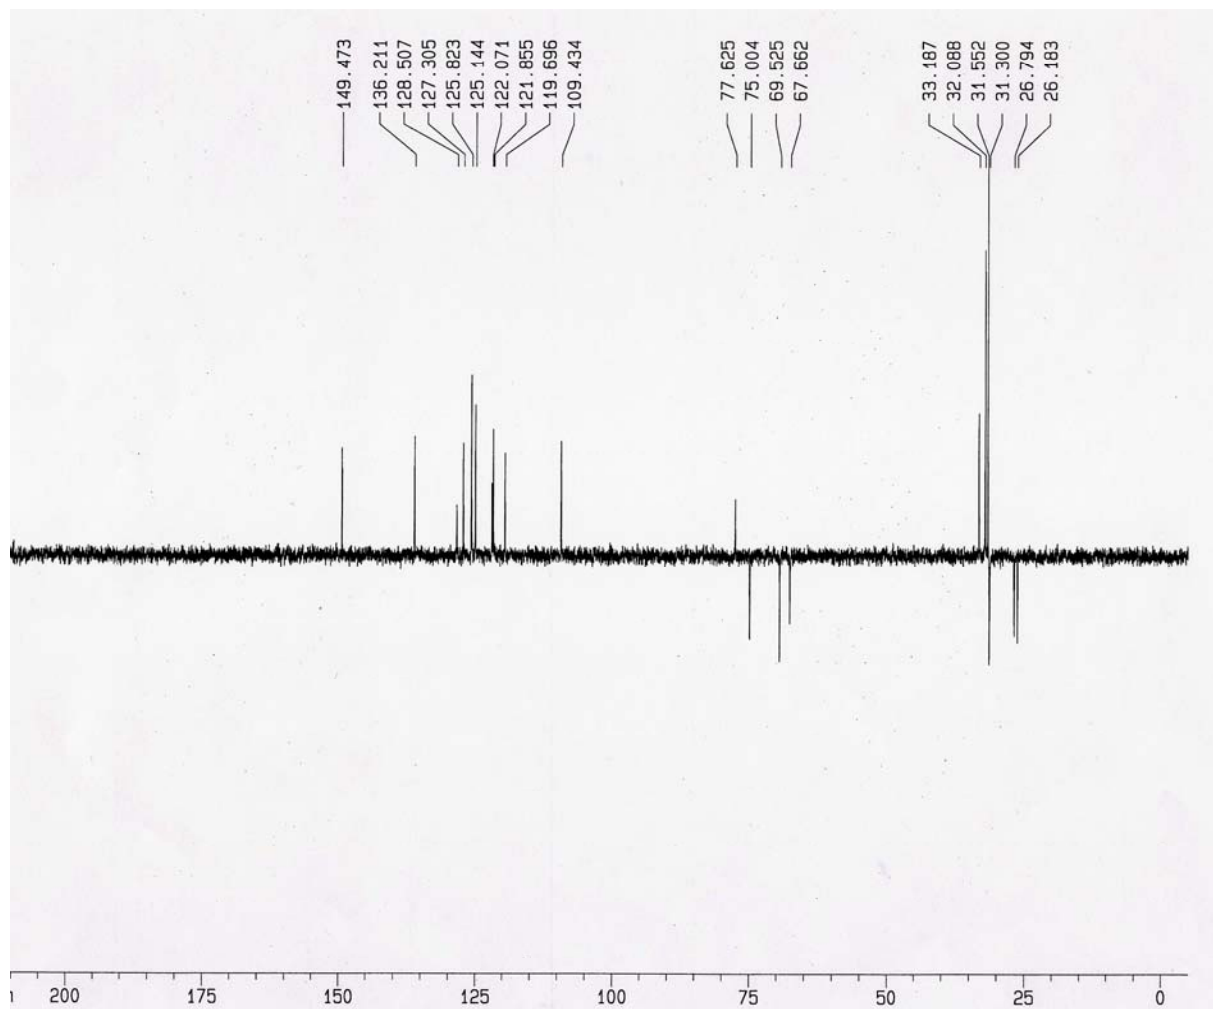

**Figure S11:** COSY NMR Spectrum of compound **3**

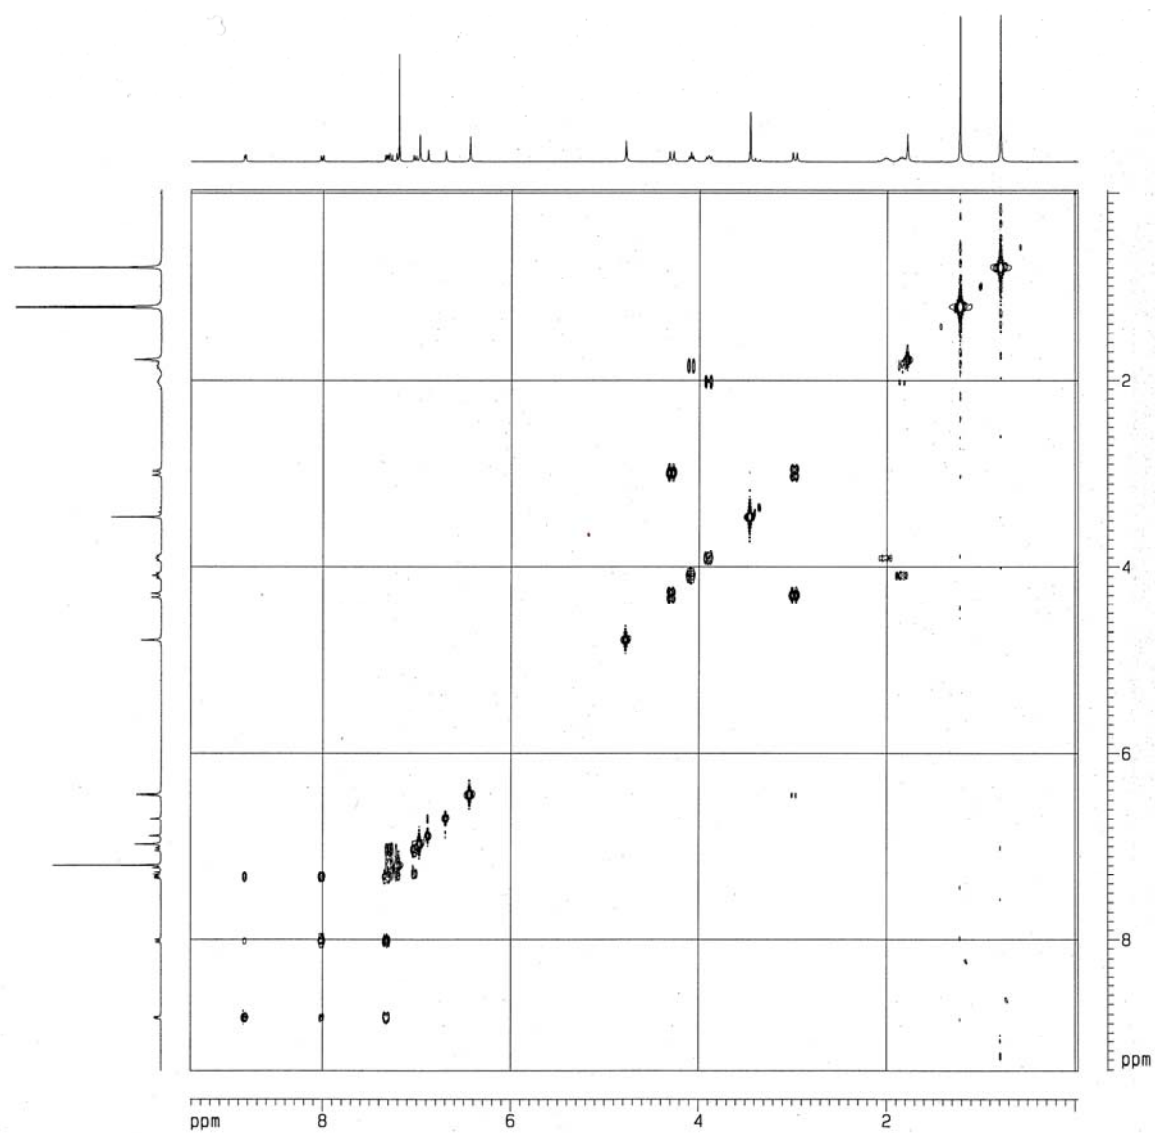

**Figure S12:** HSQC NMR Spectrum of compound **3**

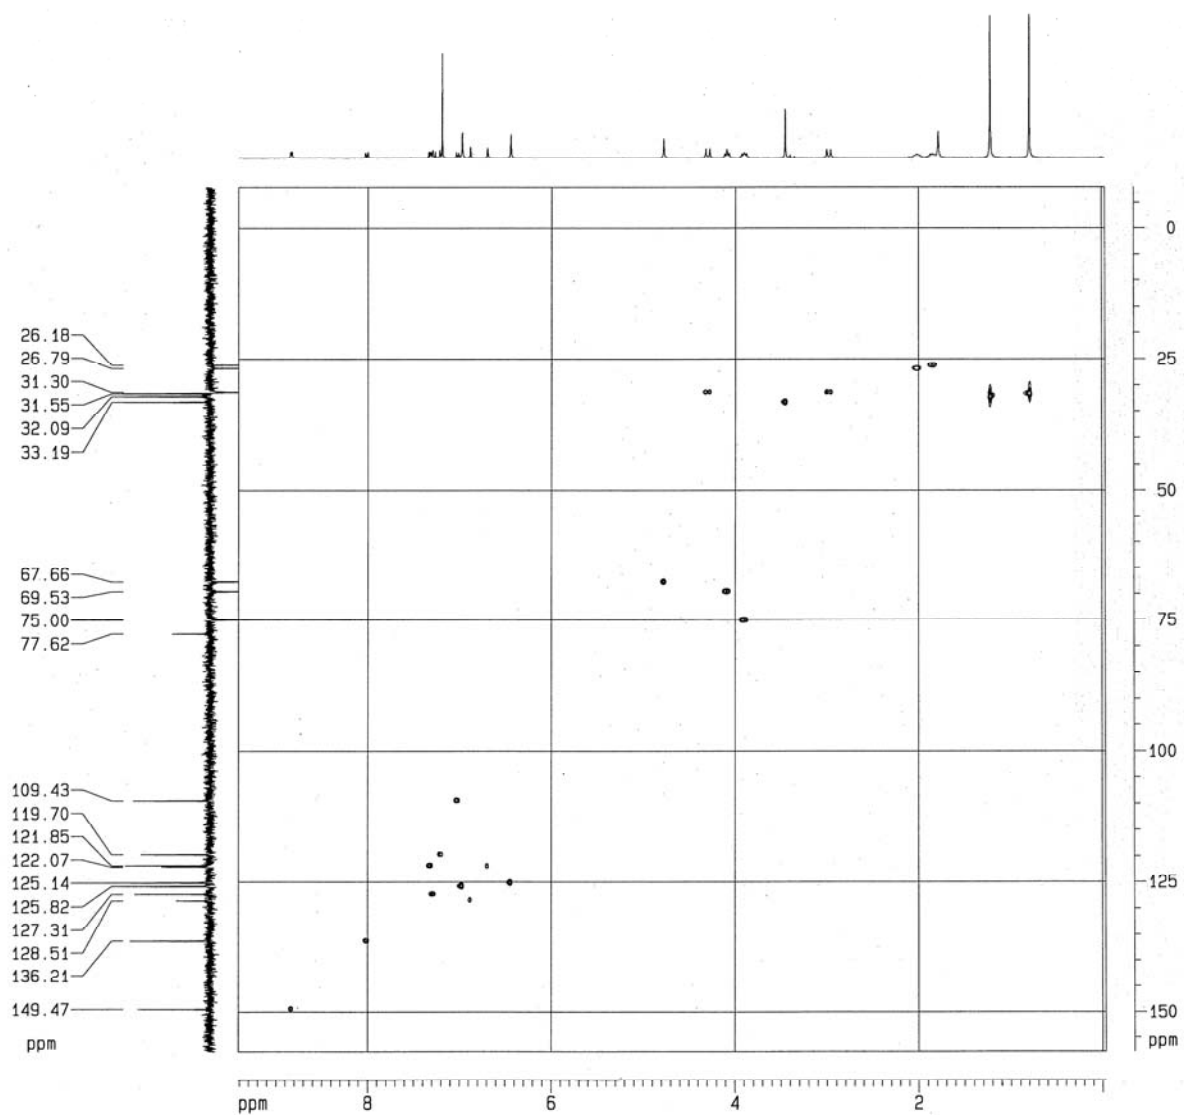

**Figure S13:** Mass Spectrum of compound **3**

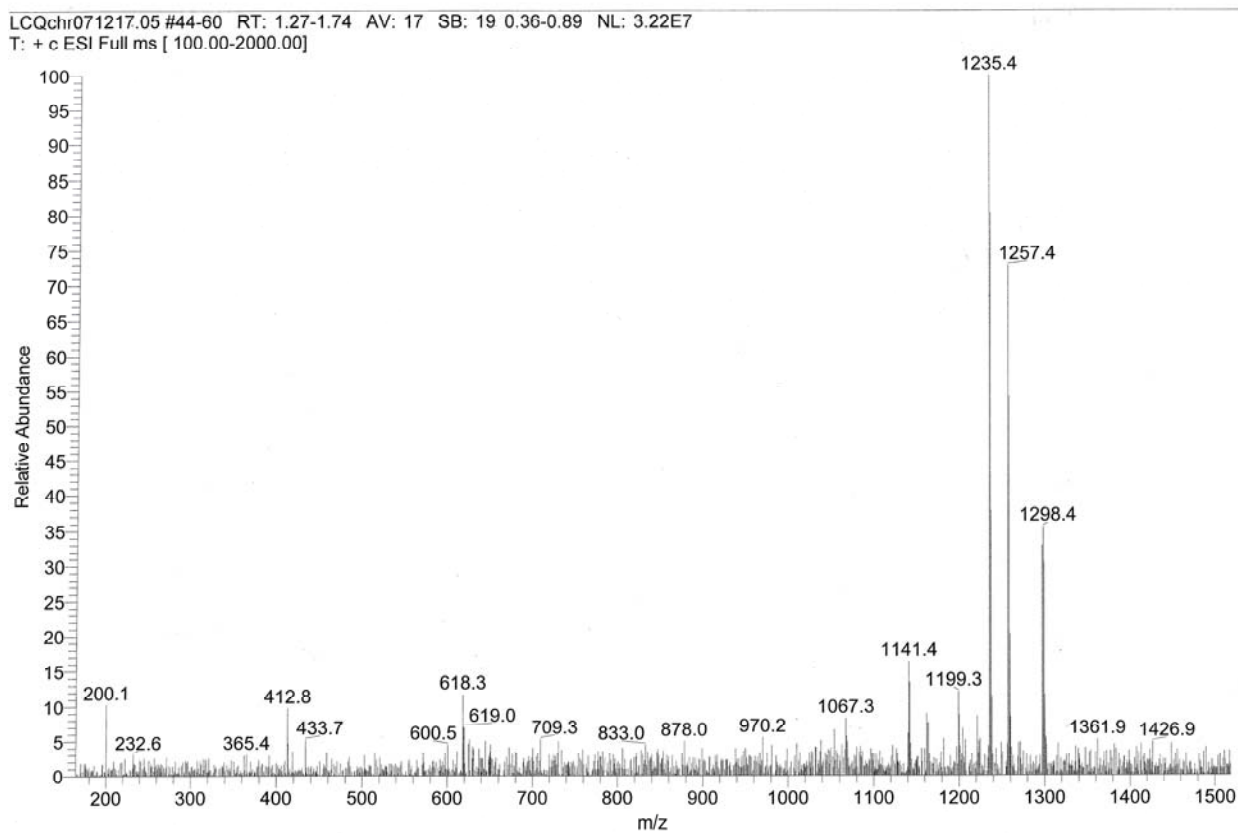

**Figure S14:** IR Spectrum of compound **3**

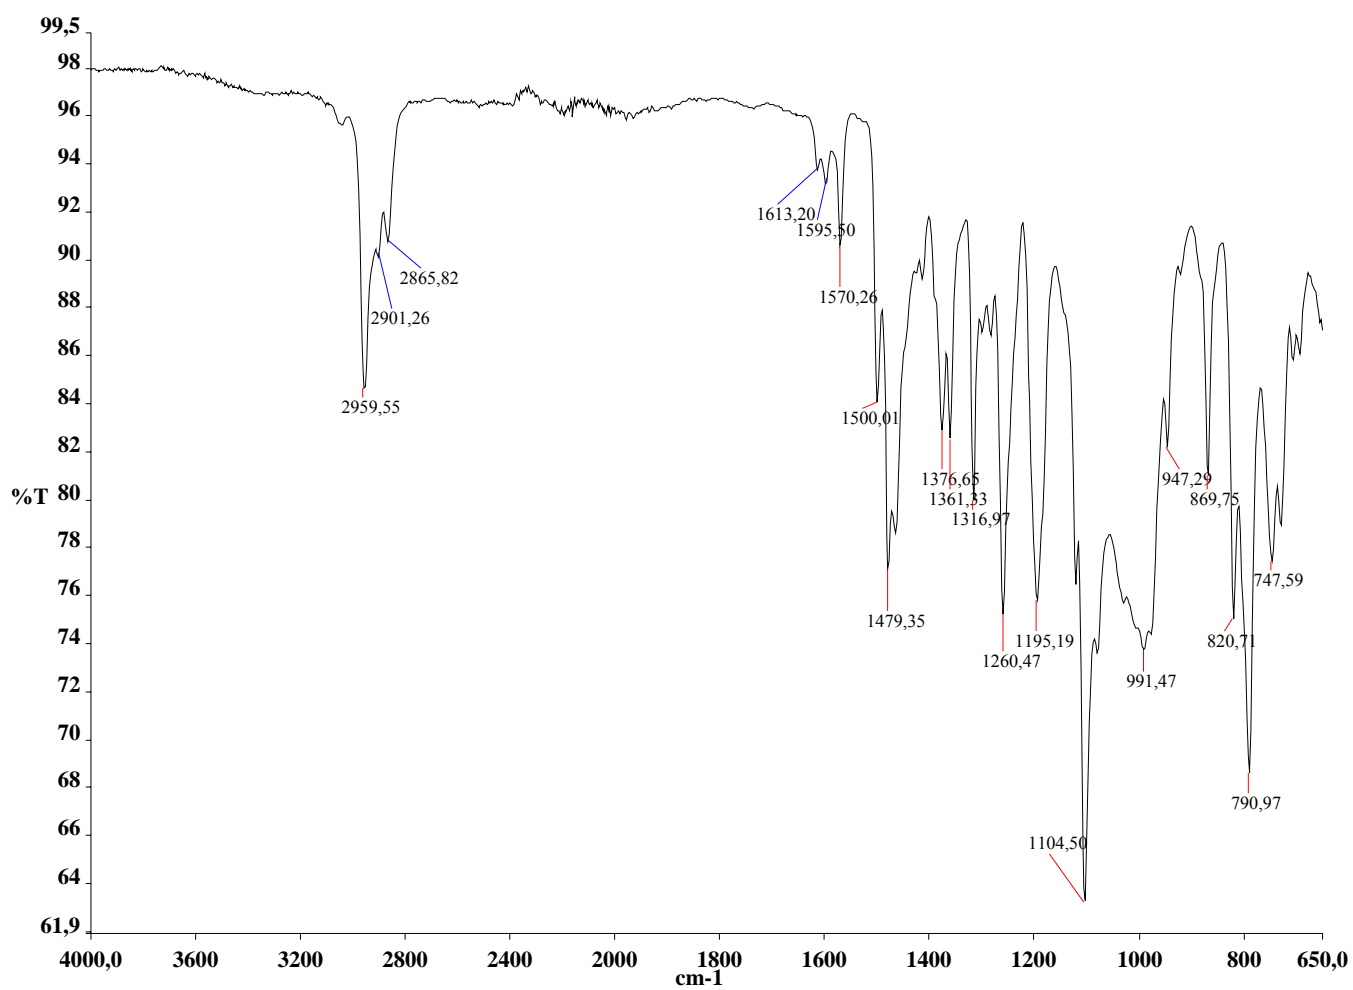

**Figure S15:**  $^1\text{H}$  NMR Spectrum of compound **3.CuI**

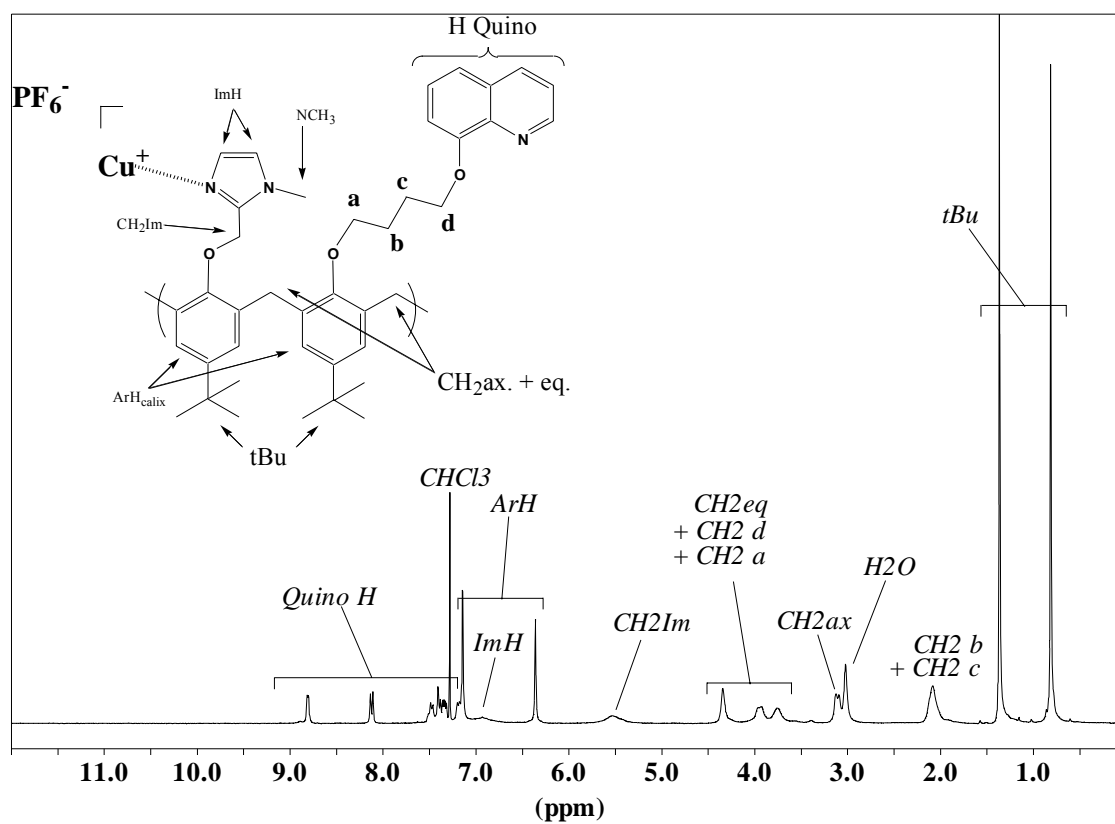

**Figure S16:**  $^{13}\text{C}$  NMR Spectrum of compound **3.CuI**

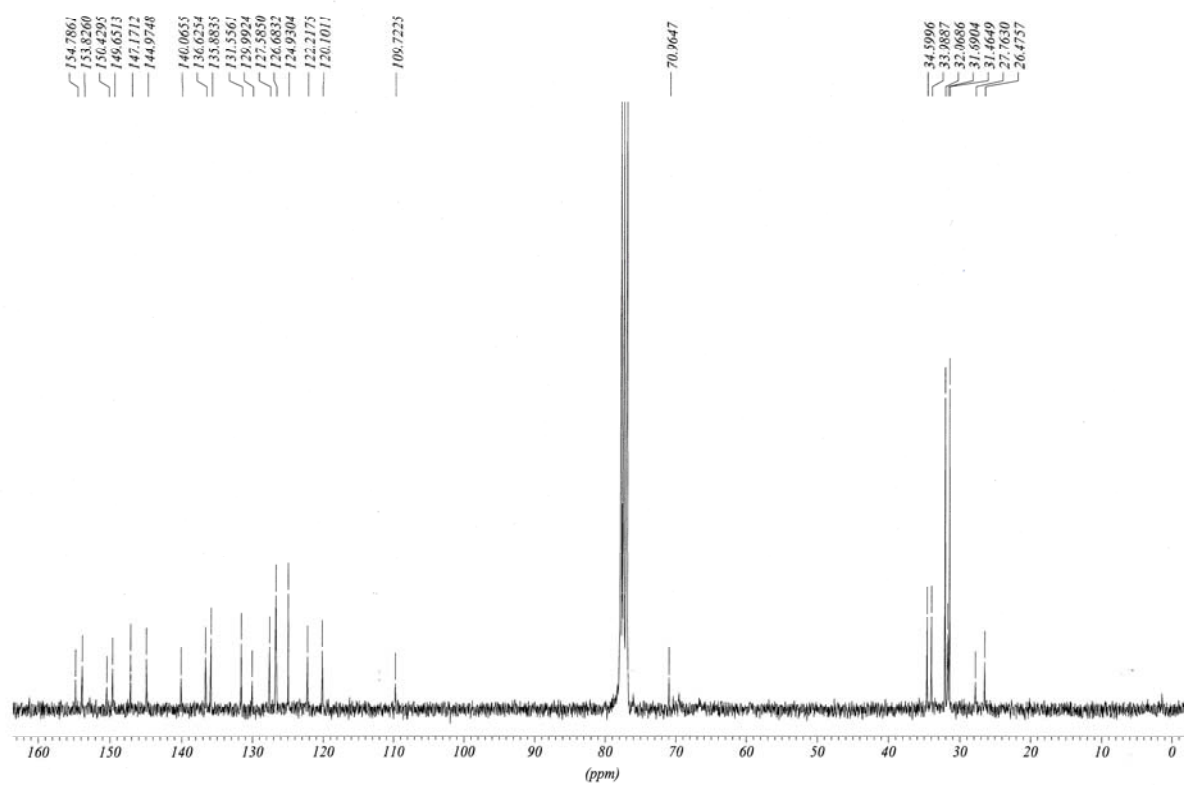

**Figure S17:** Mass Spectrum of compound **3.CuI**

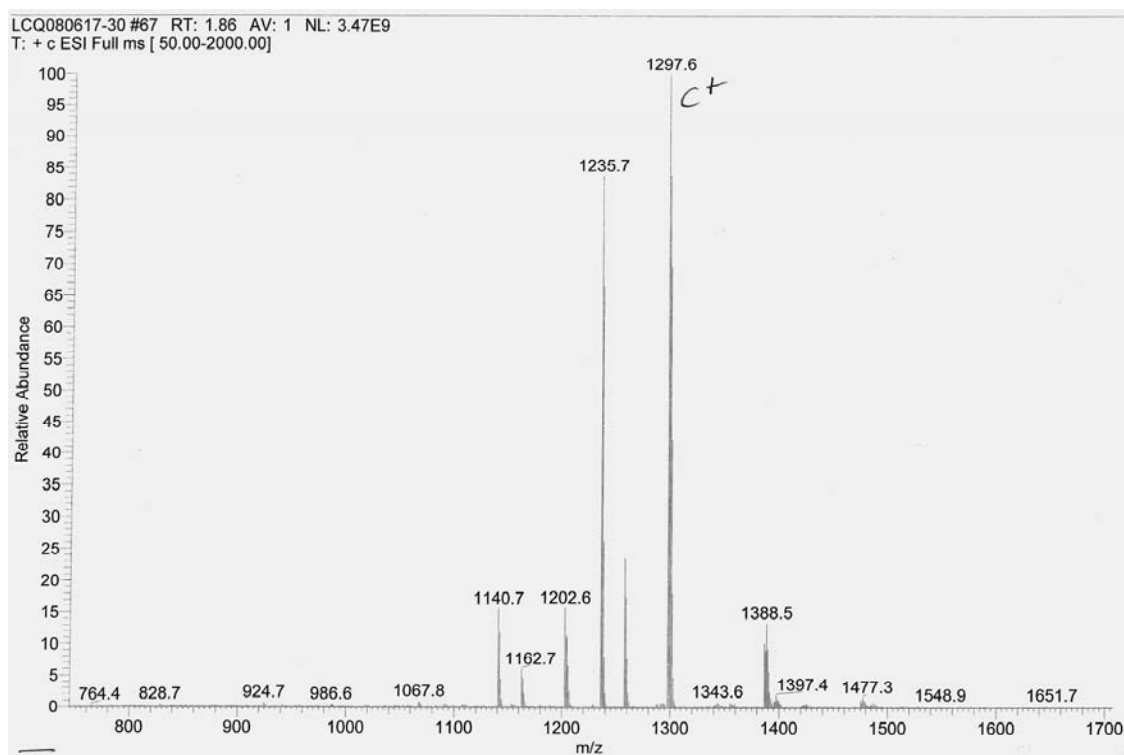



**Figure S18:** IR Spectrum of compound **3.CuI**

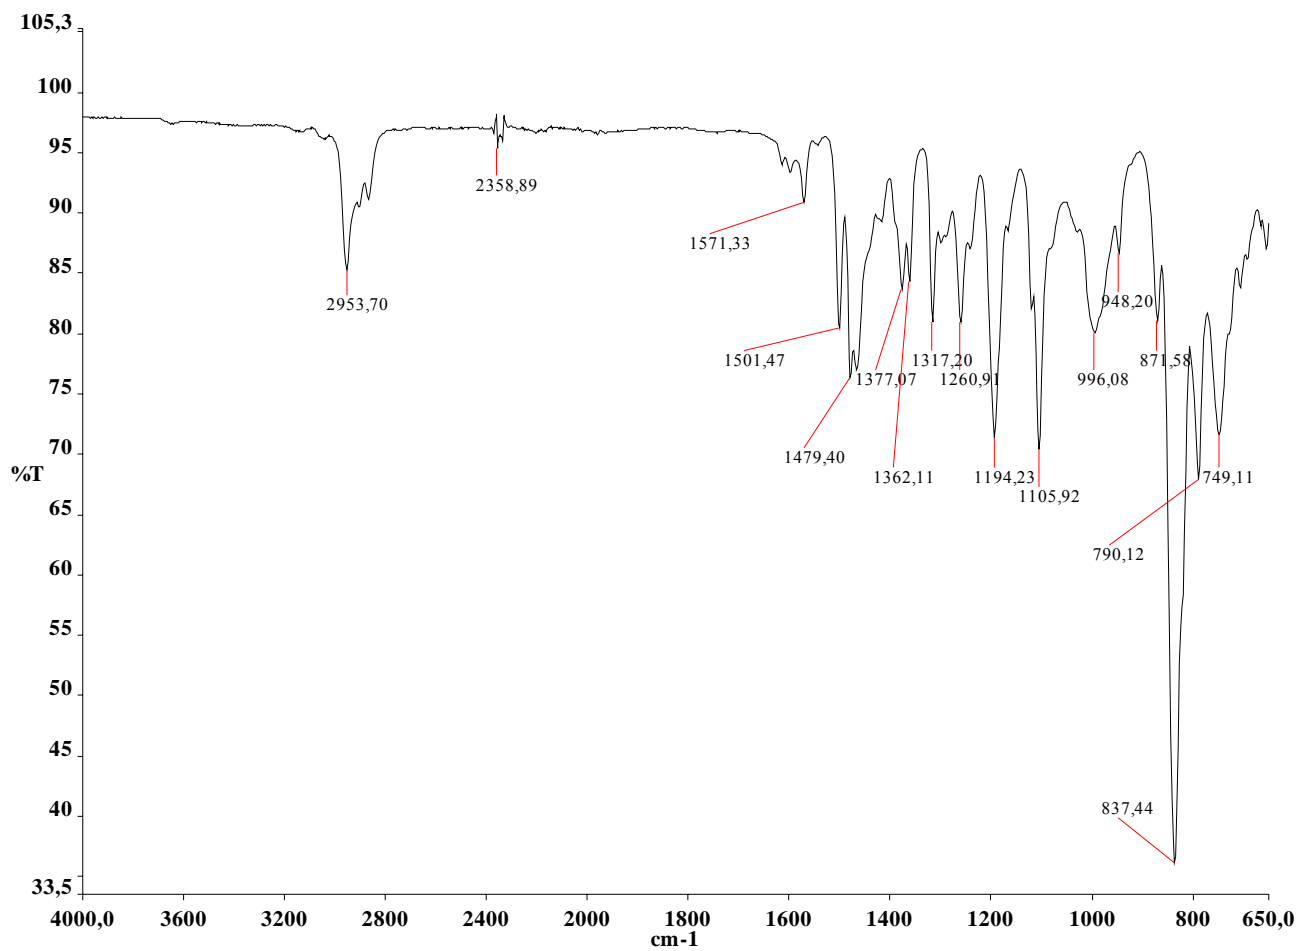

**Figure S19:** UV-vis Spectrum of compound **3.CuI** in an acetonitrile solution ( $10^{-3}$  M)

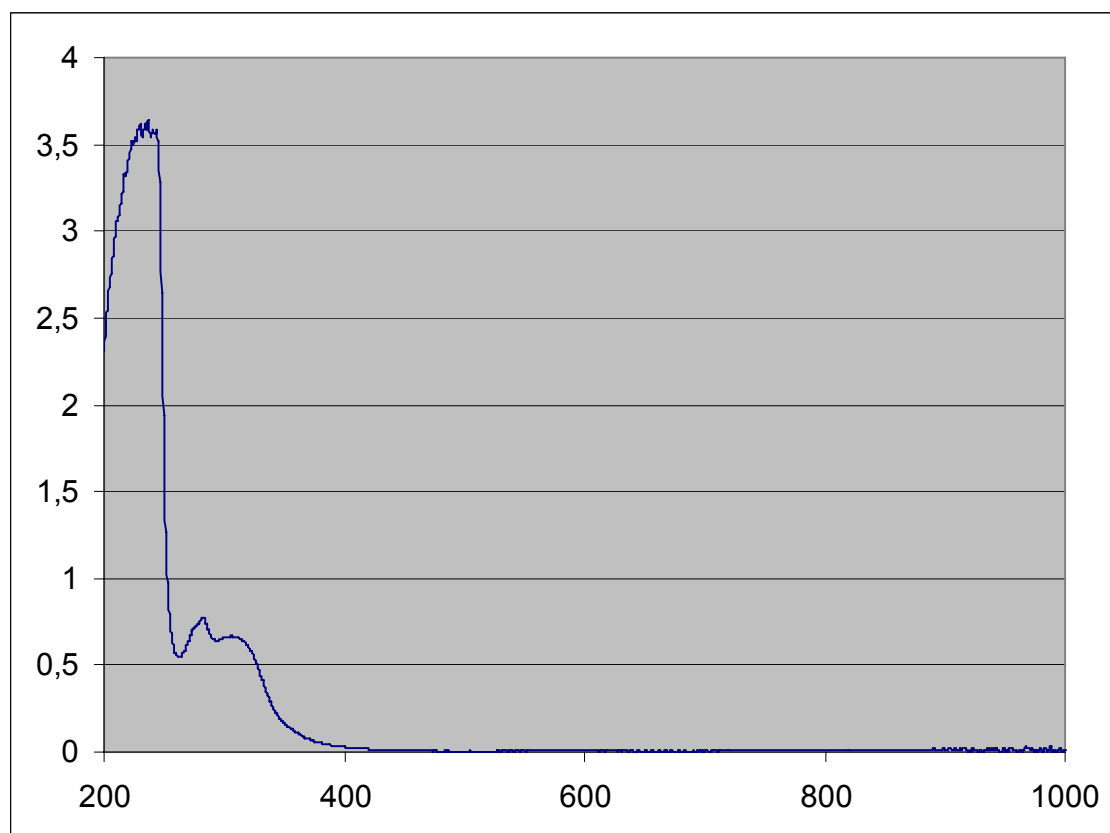

**Figure S20:** EPR Spectrum of compound **3.CuII**

EPR Spectrum, Freq. 9.44 GHz, Bruker EMX-plus spectrometer coupled with an Oxford Instrument Hélium cryostat. Frozen solution (1.45 mM) in CH<sub>3</sub>CN/Toluène 1/1, v/v), T= 40K

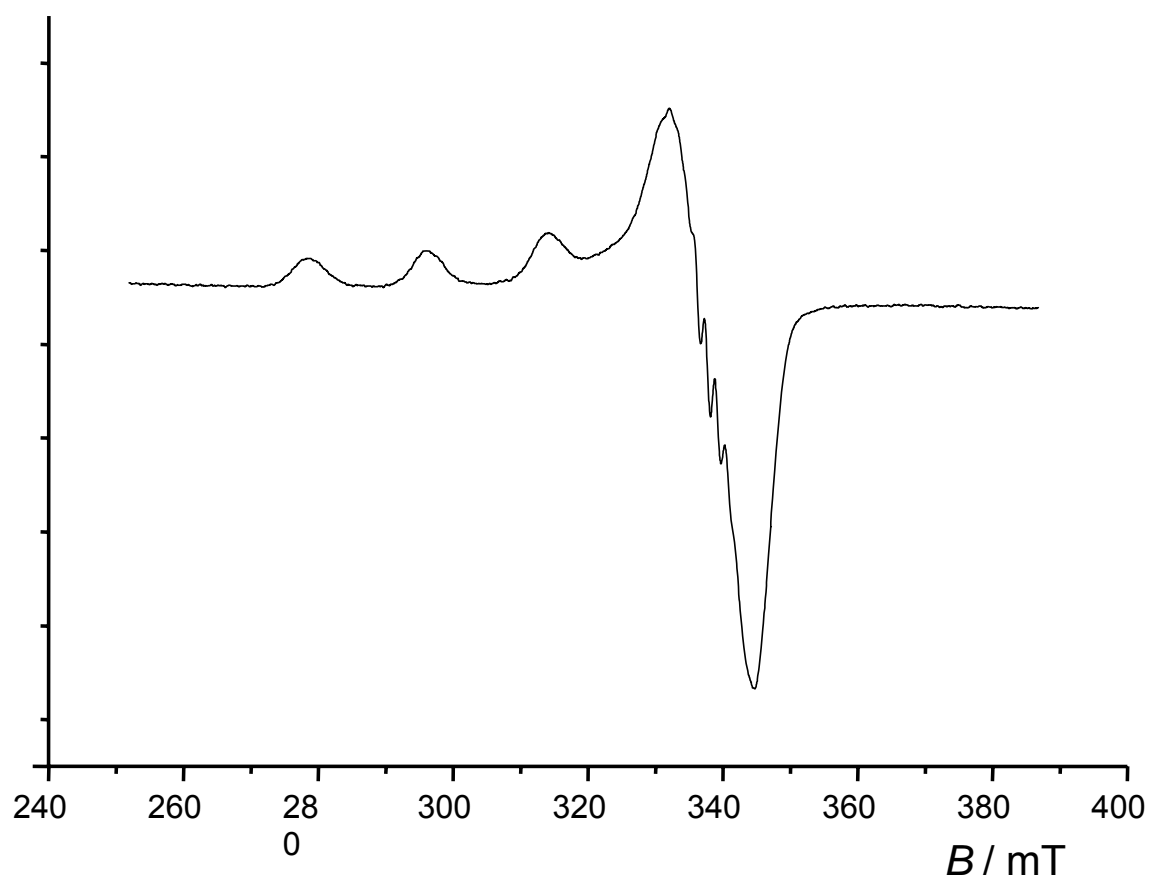

$$A_{//} = 172 \cdot 10^{-4} \text{ cm}^{-1}$$
$$g_{//} = 2.211$$
$$g_{\perp} = 2.004$$

**Figure S21:** Mass Spectrum of compound **3.CuII**

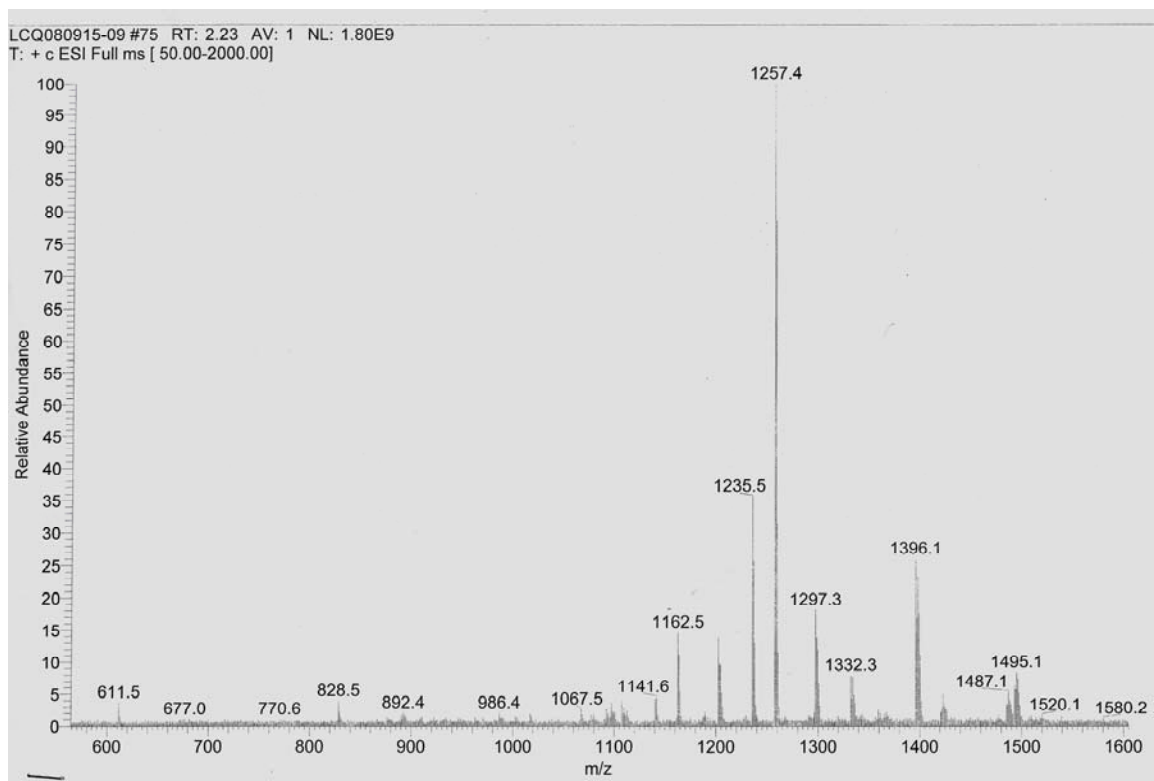

**Figure S22:** IR Spectrum of compound **3.CuII**

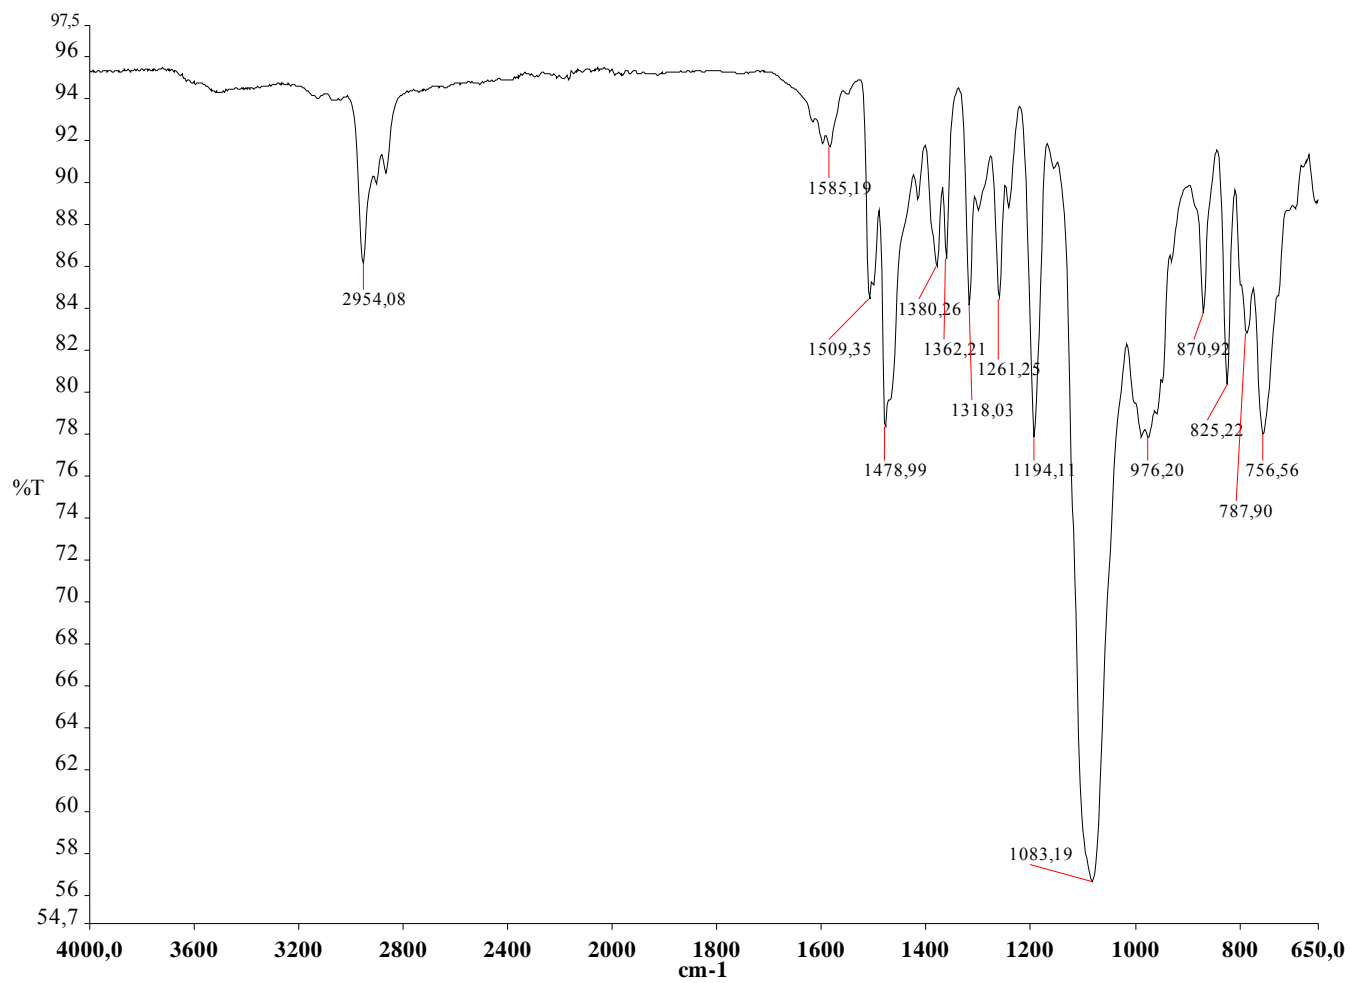

**Figure S23:** UV-vis Spectrum of compound **3.CuII**. Top: solid state, bottom: in acetonitrile solution (10<sup>-3</sup> M)

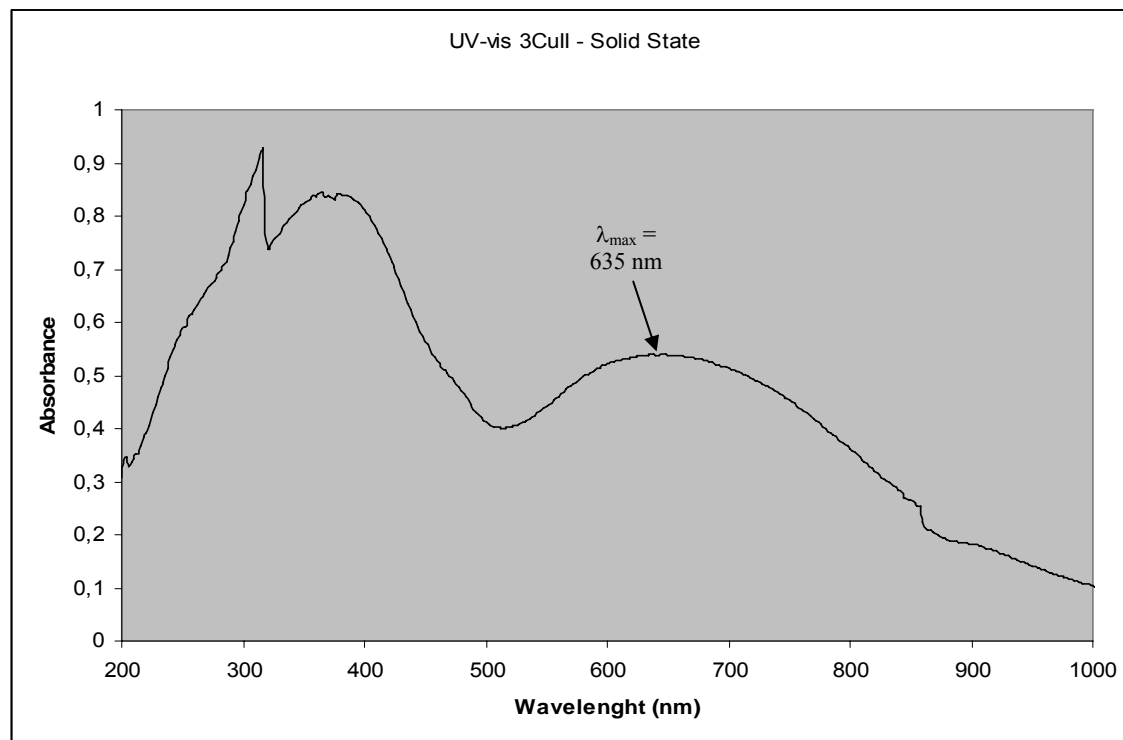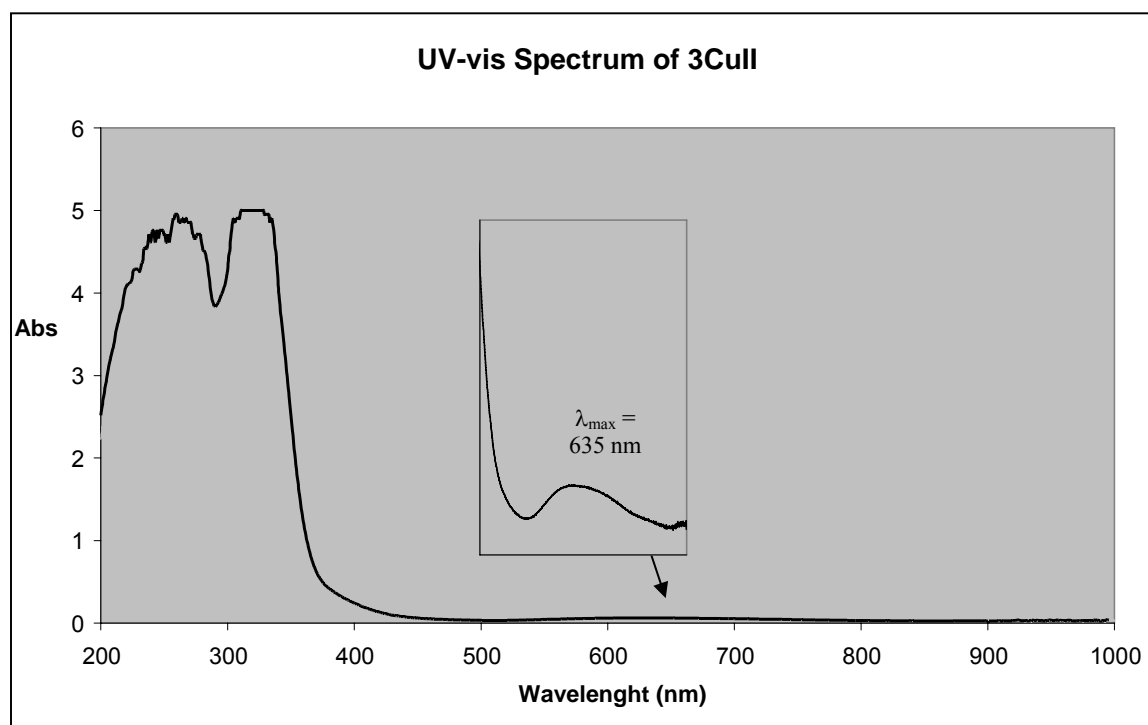

**Figure S24:** Dual display of  $^1\text{H}$  NMR spectra of compounds **3** and **3.CuI**

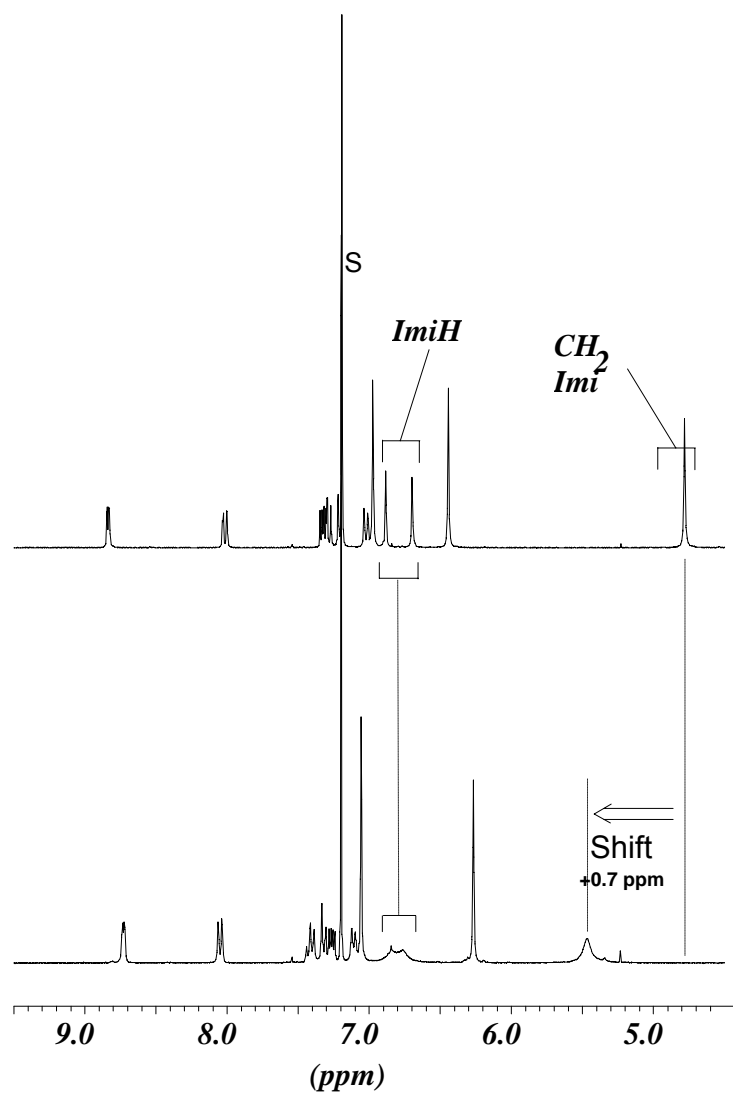

**Figure S25:** CV curves of  $[3.Cu(I)]^+$  in  $CH_3CN + 0.1 M TBAPF_6$  ( $0.1 V.s^{-1}$ , 1 mM, vitr. Carbon  $\varnothing 2 mm$ ,  $E$  vs  $Ag/Ag^+$ ).

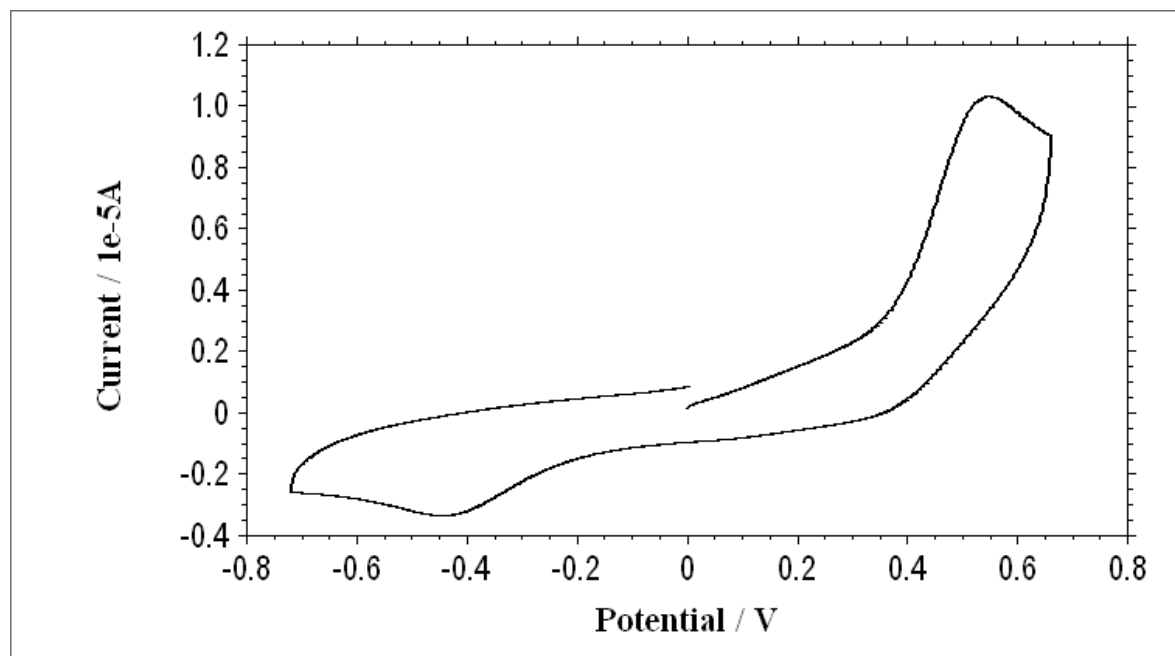



**Figure S26:** CV curves of  $[3.Cu(I)]^+$  in  $CH_3CN + 0.1 M TBAPF_6$  ( $1 V.s^{-1}$ ,  $1 mM$ , vitr. carbon  $\varnothing 2 mm$ ,  $E$  vs  $Ag/Ag^+$ ).

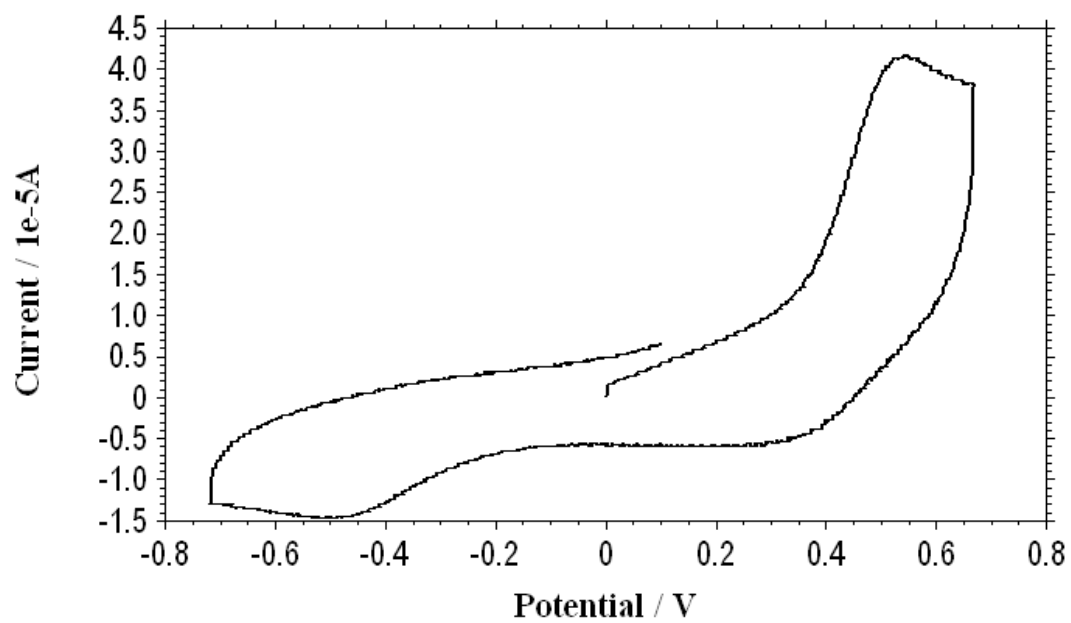

**Figure S27:** CV curves of  $[3.Cu(I)]^+$  in  $CH_3CN + 0.1 M TBAPF_6$  ( $5V.s^{-1}$ , 1 mM, vitr. carbon  $\varnothing$  2 mm,  $E$  vs  $Ag/Ag^+$ ).

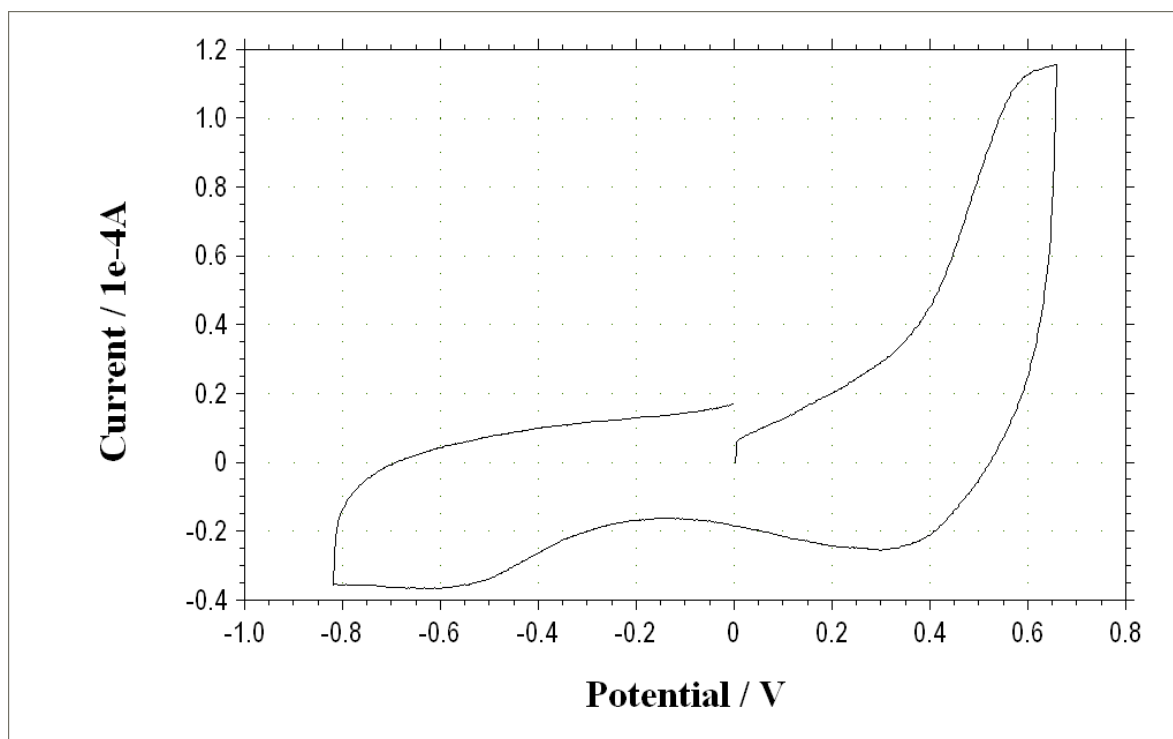

**Figure S28:** (*solid line*) Voltamperogram of  $[\mathbf{3.Cu(I)}]^+$  recorded with a vitreous carbon rotating disk in  $\text{CH}_3\text{CN} + 0.1 \text{ M TBAPF}_6$  ( $500 \text{ rd. s}^{-1}$ ,  $10 \text{ mV.s}^{-1}$ ,  $1 \text{ mM}$ , vitr. carbon  $\varnothing 2 \text{ mm}$ ,  $E$  vs  $\text{Ag/Ag}^+$ ).

(*crosses*) Voltamperogram recorded with a vitreous carbon rotating disk after bulk oxidation (carbon working electrode,  $E_{\text{app}} = 0.8 \text{ V}$ ) of  $[\mathbf{3.Cu(I)}]^+$  in  $\text{CH}_3\text{CN} + 0.1 \text{ M TBAPF}_6$  ( $500 \text{ rd. s}^{-1}$ ,  $10 \text{ mV.s}^{-1}$ ,  $1 \text{ mM}$ , vitr. carbon  $\varnothing 2 \text{ mm}$ ,  $E$  vs  $\text{Ag/Ag}^+$ ).

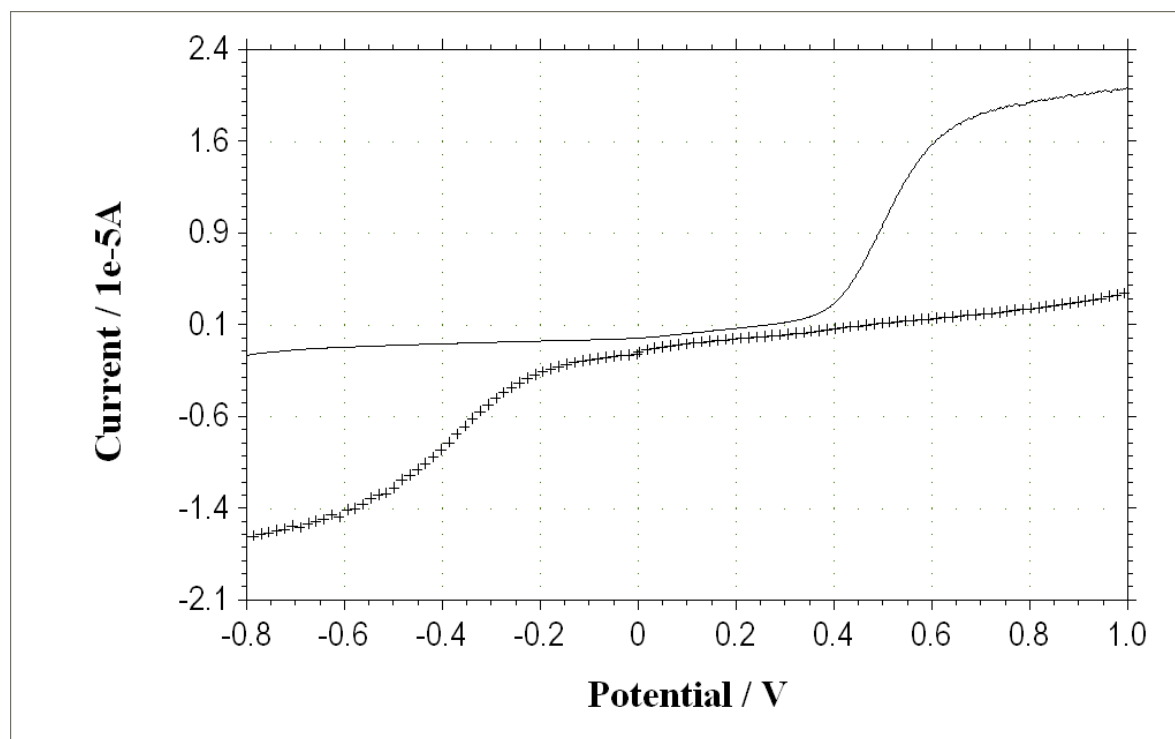

**Figure S29:** (solid line) CV curve of  $[3.Cu(I)]^+$  recorded in  $CH_3CN + 0.1 M TBAPF_6$  ( $100 mV.s^{-1}$ ,  $1 mM$ , vitr. carbon  $\varnothing 2 mm$ ,  $E$  vs  $Ag/Ag^+$ ).  
(crosses) CV curve recorded after bulk oxidation (carbon working electrode,  $E_{app} = 0.8 V$ ) of  $[3.Cu(I)]^+$  in  $CH_3CN + 0.1 M TBAPF_6$  ( $100 mV.s^{-1}$ ,  $1 mM$ , vitr. carbon  $\varnothing 2 mm$ ,  $E$  vs  $Ag/Ag^+$ ).

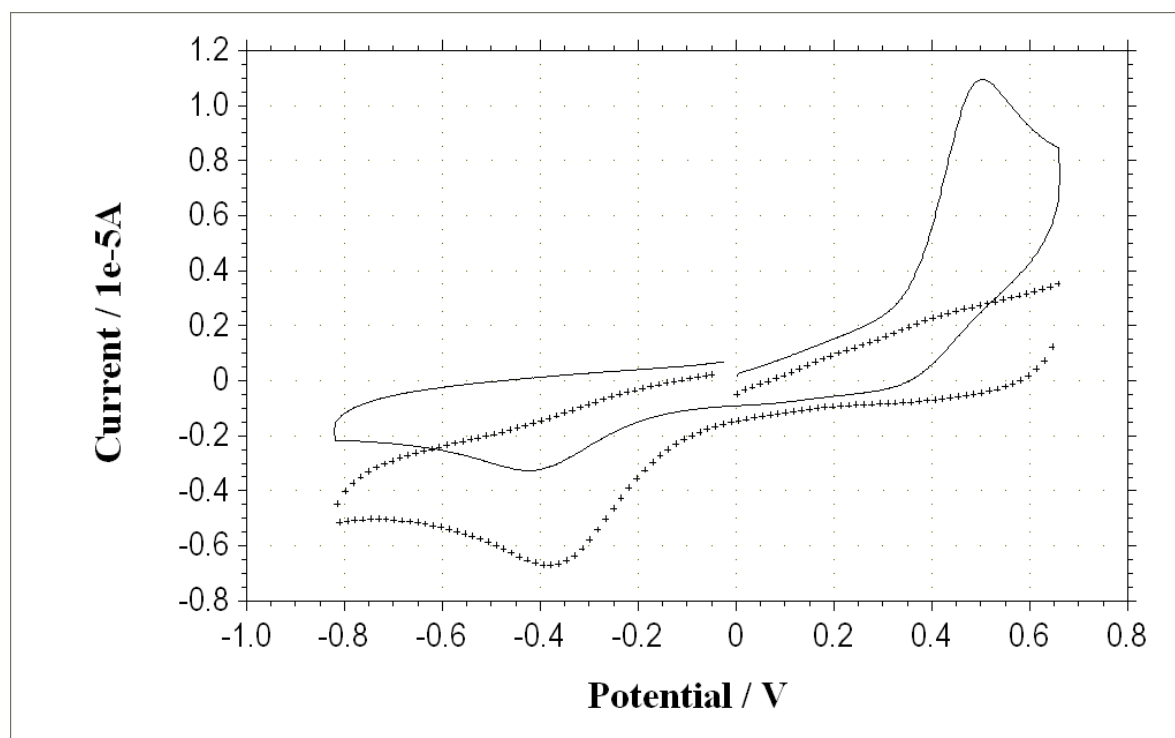

**Figure S30:** CV curve recorded after bulk oxidation (carbon working electrode,  $E_{\text{app}} = 0.8$  V) of  $[3.\text{Cu(I)}]^+$  in  $\text{CH}_3\text{CN} + 0.1$  M  $\text{TBAPF}_6$  ( $100 \text{ mV}\cdot\text{s}^{-1}$ , 1 mM, vitr. carbon  $\varnothing$  2 mm,  $E$  vs  $\text{Ag}/\text{Ag}^+$ )

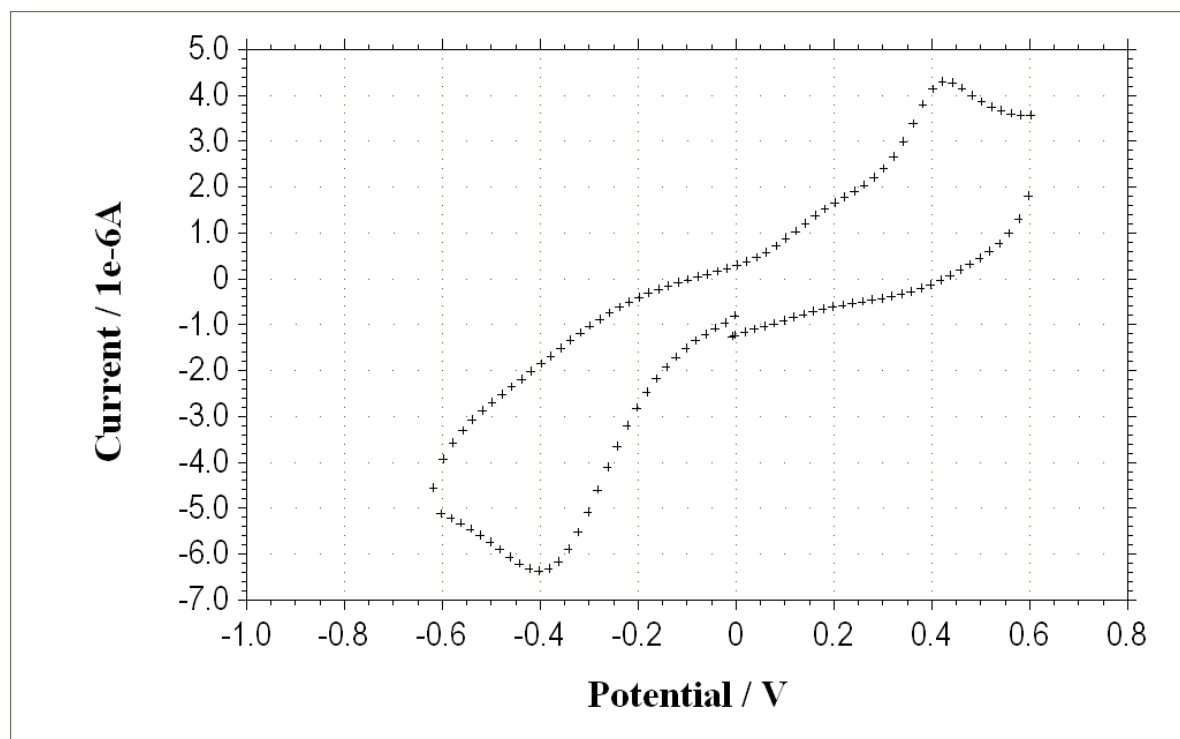

**Figure S31:** CV curves of  $[3.Cu(II)]^{2+}$  in  $CH_3CN + 0.1 M TBAPF_6$  (  $0.1 V.s^{-1}$ , 1 mM, vitr. carbon  $\varnothing$  2 mm,  $E$  vs  $Ag/Ag^+$ ).

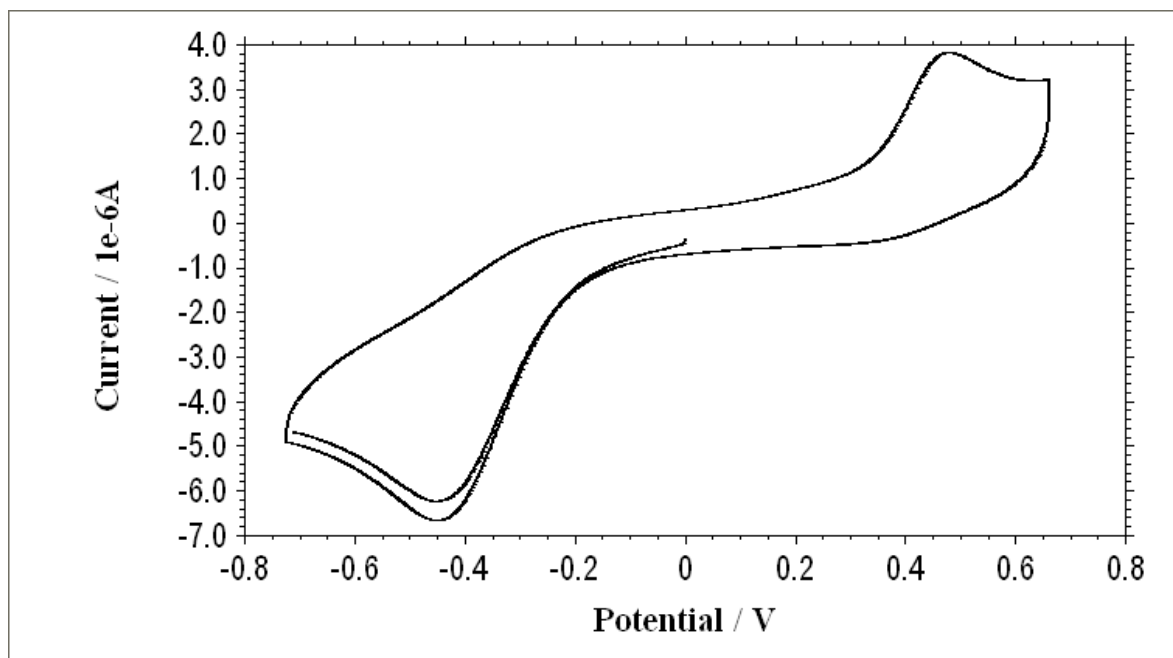

**Figure S32:** CV curves of  $[3.Cu(II)]^{2+}$  in  $CH_3CN + 0.1 M TBAPF_6$  ( $1 V.s^{-1}$ ,  $1 mM$ , vitr. carbon  $\varnothing$   $2 mm$ ,  $E$  vs  $Ag/Ag^+$ ).

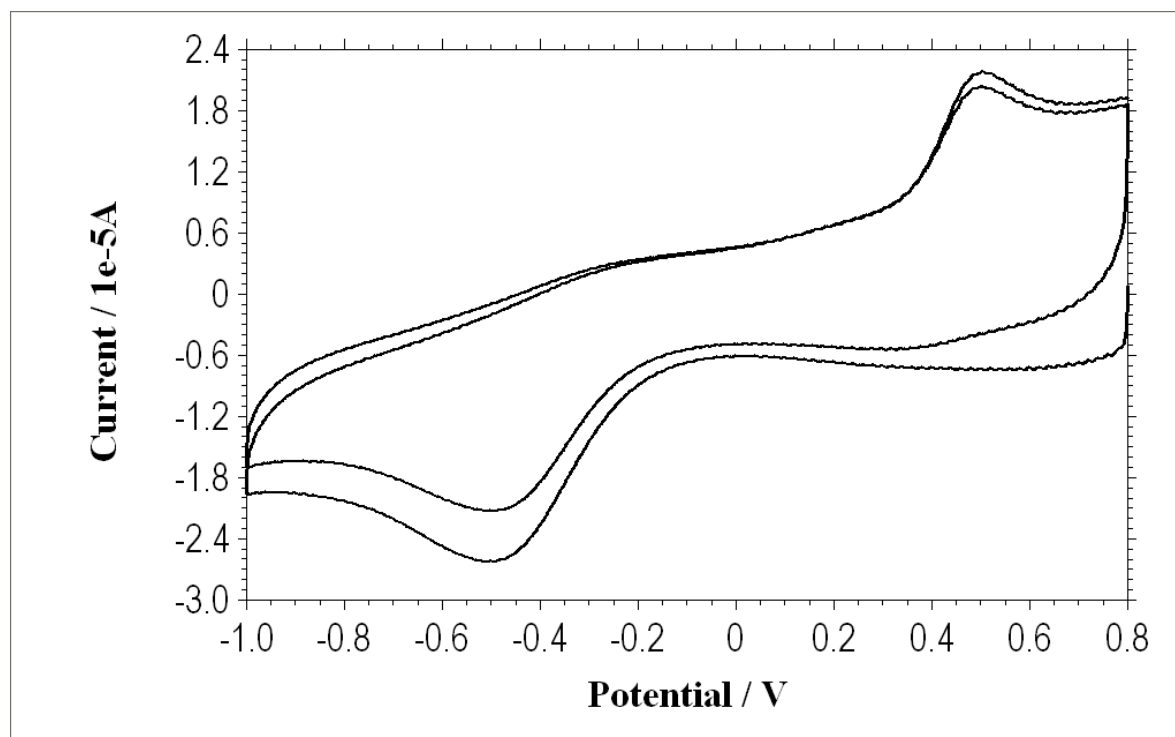

**Figure S33:** CV curves of  $[3.Cu(II)]^{2+}$  in  $CH_3CN + 0.1 M TBAPF_6$  ( $10 V.s^{-1}$ ,  $1 mM$ , vitr. Carbon  $\varnothing 2 mm$ ,  $E$  vs  $Ag/Ag^+$ ).

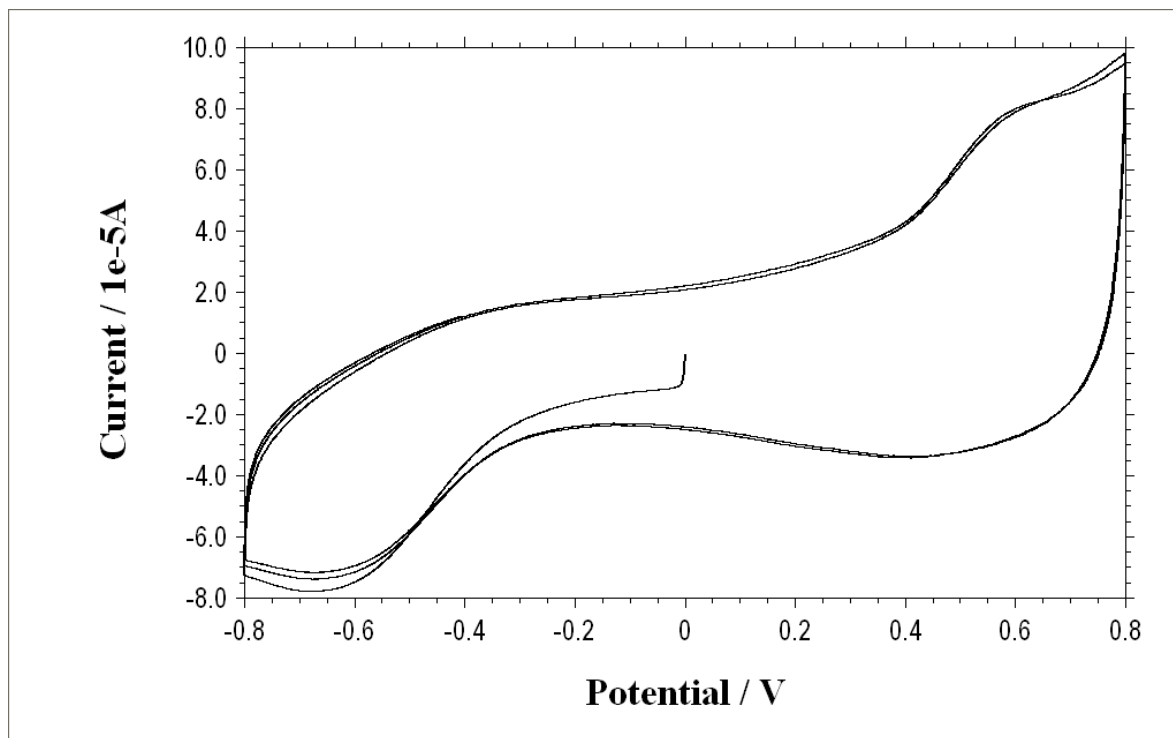



**Figure S34:** Voltamperogram recorded with a vitreous carbon rotating disk on  $[3.Cu(II)]^{2+}$  in  $CH_3CN + 0.1 M TBAPF_6$  ( $500 \text{ rd. s}^{-1}$ ,  $10 \text{ mV.s}^{-1}$ ,  $1 \text{ mM}$ , vitr. carbon  $\varnothing 2 \text{ mm}$ ,  $E$  vs  $Ag/Ag^+$ ).

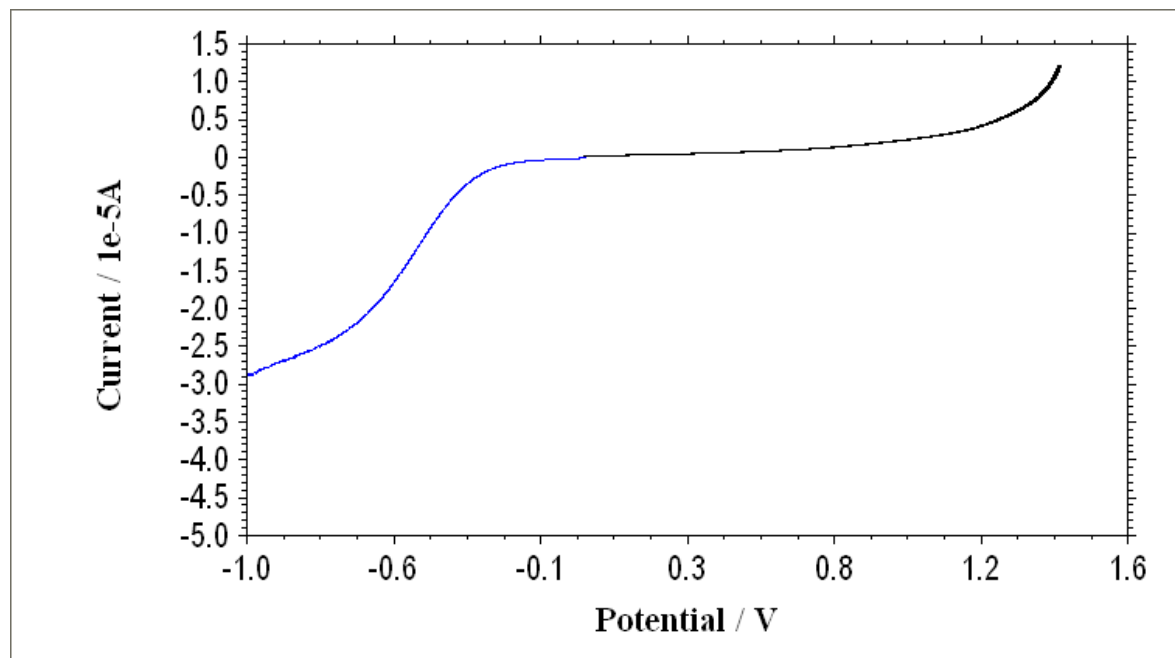

**Figure S35:** Reduction/oxidation cycles followed by UV-Vis spectroscopy (absorbance recorded at  $\lambda = 635$  nm). Successive electrolyses ( $Q = 0.16$  C) were carried out in a 1cm quartz cell starting from LCuI ( $1 \times 10^{-3}$  M in DMF, 0.1 M TBAP) upon switching the working electrode potential ( $1 \text{ cm}^2$  vitreous carbon) between + 0.6 and -0.6 V vs Ag/Ag<sup>+</sup>.

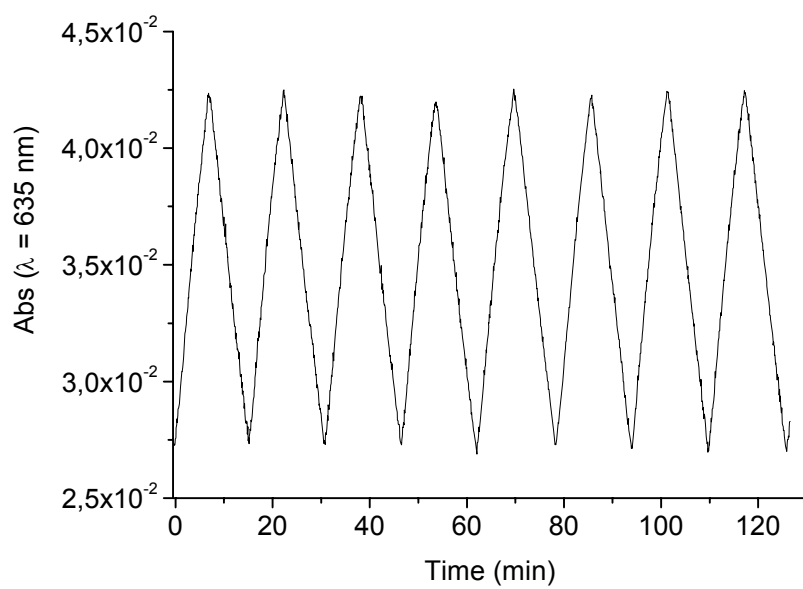

Supplement: b907207a.pdf [file b907207a.pdf]
